1 **Liver type 1 innate lymphoid cells lacking IL-7 receptor are a native killer cell subset**  
2 **fostered by parenchymal niches**

3

4 **Takuma Asahi<sup>1,2</sup>, Shinya Abe<sup>1,2</sup>, Guangwei Cui<sup>1</sup>, Akihiro Shimba<sup>1,3</sup>, Tsukasa**  
5 **Nabekura<sup>4,5,6</sup>, Hitoshi Miyachi<sup>7</sup>, Satsuki Kitano<sup>7</sup>, Keizo Ohira<sup>1,8</sup>, Johannes M. Dijkstra<sup>9</sup>,**  
6 **Masaki Miyazaki<sup>10</sup>, Akira Shibuya<sup>4,5,6</sup>, Hiroshi Ohno<sup>11</sup>, and Koichi Ikuta<sup>1,\*</sup>**

7

8 <sup>1</sup>Laboratory of Immune Regulation, Department of Virus Research, Institute for Life and  
9 Medical Sciences, Kyoto University, Kyoto 606-8507, Japan; <sup>2</sup>Graduate School of Medicine,  
10 Kyoto University, Kyoto 606-8501, Japan; <sup>3</sup>Department of Human Health Sciences, Graduate  
11 School of Medicine, Kyoto University, Kyoto 606-8507, Japan; <sup>4</sup>Life Science Center for  
12 Survival Dynamics, Tsukuba Advanced Research Alliance (TARA), University of Tsukuba, 1-  
13 1-1 Tennodai, Tsukuba, Ibaraki 305-8575, Japan; <sup>5</sup>Department of Immunology, Faculty of  
14 Medicine, University of Tsukuba, 1-1-1 Tennodai, Tsukuba, Ibaraki 305-8575, Japan; <sup>6</sup>R&D  
15 Center for Innovative Drug Discovery, University of Tsukuba, 1-1-1 Tennodai, Tsukuba,  
16 Ibaraki 305-8575, Japan; <sup>7</sup>Reproductive Engineering Team, Institute for Life and Medical  
17 Sciences, Kyoto University, Kyoto 606-8507, Japan; <sup>8</sup>Graduate School of Biostudies, Kyoto  
18 University, Kyoto 606-8501, Japan; <sup>9</sup>Center for Medical Science, Fujita Health University,  
19 Aichi 470-1192, Japan; <sup>10</sup>Laboratory of Immunology, Institute for Life and Medical  
20 Sciences, Kyoto University, Kyoto 606-8507, Japan; <sup>11</sup>Laboratory for Intestinal Ecosystem,  
21 RIKEN Center for Integrative Medical Sciences (IMS), Yokohama 230-0045, Japan

22

23 \*Correspondence

24 E-mail address: [ikuta.koichi.6c@kyoto-u.ac.jp](mailto:ikuta.koichi.6c@kyoto-u.ac.jp)

25 Laboratory of Immune Regulation, Department of Virus Research, Institute for Life and  
26 Medical Sciences, Kyoto University, Kyoto 606-8507, Japan

27 Tel, +81-75-751-4012; Fax, +81-75-751-4810.

28

29 **Keywords:** ILC1s; NK cells; Interleukin 15; development; niche; cytotoxicity

30

31 **Abstract** 191 words

32

33 Group 1 innate lymphoid cells (G1-ILCs), including circulating natural killer (NK) cells and  
34 tissue-resident type 1 ILCs (ILC1s), are innate immune sentinels critical for responses against  
35 infection and cancer. In contrast to relatively uniform NK cells through the body, diverse  
36 ILC1 subsets have been characterized across and within tissues in mice, but their  
37 developmental and functional heterogeneity remain unsolved. Here, using multimodal *in vivo*  
38 approaches including fate-mapping and targeting of the interleukin 15 (IL-15)-producing  
39 microenvironment, we demonstrate that liver parenchymal niches support the development of  
40 a cytotoxic ILC1 subset lacking IL-7 receptor ( $7R^-$  ILC1s). During ontogeny, fetal liver (FL)  
41 G1-ILCs arise perivascularly and then differentiate into  $7R^-$  ILC1s within sinusoids.  
42 Hepatocyte-derived IL-15 supports parenchymal development of FL G1-ILCs to maintain  
43 adult pool of  $7R^-$  ILC1s. IL-7 $R^+$  ( $7R^+$ ) ILC1s in the liver, candidate precursors for  $7R^-$  ILC1s,  
44 are not essential for  $7R^-$  ILC1 development in physiological conditions. Functionally,  $7R^-$   
45 ILC1s exhibit killing activity at steady state through granzyme B expression, which is  
46 underpinned by constitutive mTOR activity, unlike NK cells with exogenous stimulation-  
47 dependent cytotoxicity. Our study reveals the unique ontogeny and functions of liver-specific  
48 ILC1s, providing a detailed interpretation of ILC1 heterogeneity.

49

## 50 **Introduction**

51

52 Group 1 innate lymphoid cells (G1-ILCs) are innate immune cells contributing to surveillance  
53 of intracellular infections and tumors. G1-ILCs comprise two subtypes: natural killer (NK)  
54 cells and type 1 ILCs (ILC1s), that share fundamental features such as NK1.1<sup>+</sup>NKp46<sup>+</sup>  
55 phenotype, expression of T-bet, and IFN- $\gamma$  production (Jacquelot et al., 2022; Stokic-Trtica et  
56 al., 2020; Vivier et al., 2018). In contrast, mouse ILC1s can be distinguished from NK cells by  
57 their CD49a<sup>+</sup>CD49b<sup>-</sup> phenotype, strict tissue-residency, and Eomes-independence (Daussy et  
58 al., 2014; Gasteiger et al., 2015; Peng et al., 2013; Sojka et al., 2014). In addition,  
59 developmental paths of ILC1s are basically distinct from NK cells, as confirmed by the  
60 identification of non-NK common ILC progenitors (ILCPs) expressing PLZF and/or PD-1  
61 (Constantinides et al., 2015; Constantinides et al., 2014; Yu et al., 2016) and liver-resident  
62 Lin<sup>-</sup>Sca-1<sup>+</sup>Mac-1<sup>+</sup> (LSM) and Lin<sup>-</sup>CD49a<sup>+</sup>CD122<sup>+</sup> ILC1 precursors (Bai et al., 2021).

63 Functional differences between NK cells and ILC1s have also been recognized,  
64 though some confusion remains, particularly in cytotoxicity. In mice, NK cells are  
65 traditionally considered as more cytotoxic than ILC1s (Vivier et al., 2018), though this view  
66 has been questioned recently (Dadi et al., 2016; Kansler et al., 2022; Krabbendam et al., 2021;  
67 Nixon et al., 2022; Yomogida et al., 2021). Indeed, murine NK cells show low expression of  
68 cytotoxic molecules and only minimal cytotoxicity in their steady state (Fehniger et al., 2007).  
69 The cytotoxicity of NK cells requires the mTOR-dependent metabolic reprogramming  
70 mediated by cytokine signaling such as IL-15 or by NK receptor engagement (Marçais et al.,  
71 2014; Nandagopal et al., 2014), but whether such cytotoxic machinery also exists in ILC1s is  
72 unclear. By contrast, ILC1s can immediately respond and produce IFN- $\gamma$  during liver injury  
73 (Nabekura et al., 2020) and virus infection (Weizman et al., 2017), highlighting the unique  
74 roles of ILC1s in the ignition of type 1 immunity in tissues. Thus, examining the development,  
75 function, and heterogeneity of ILC1s could lead to further understanding of local immune  
76 regulation and novel therapeutic strategies.

77 Recent high-resolution analysis has uncovered ILC1 heterogeneity and development.  
78 Liver ILC1s are separated into IL-7R-negative (7R<sup>-</sup>) and -positive (7R<sup>+</sup>) subsets (Friedrich et  
79 al., 2021; Sparano et al., 2022; Yomogida et al., 2021). G1-ILCs in the fetal liver (FL) are  
80 identified as precursors of ILC1s (Chen et al., 2022; Sparano et al., 2022), especially of Ly-  
81 49E<sup>+</sup> ILC1s that are included in 7R<sup>-</sup> ILC1s (Chen et al., 2022). In addition, 7R<sup>+</sup> ILC1s in the  
82 liver, salivary glands (SG), and small intestines can give rise to 7R<sup>-</sup> ILC1s in response to  
83 cytokines and inflammations (Friedrich et al., 2021), suggesting that 7R<sup>+</sup> ILC1s are also

84 potential precursors for  $7R^-$  ILC1s. However, several reports have suggested different models.  
85 In ILC1-related inflammation models reported so far, including contact hypersensitivity,  
86 MCMV infection, and liver injury, ILC1s with high cytokine receptors (IL-7R, IL-18R,  
87 and/or CD25) are induced and accumulate in the liver (Nabekura et al., 2020; Wang et al.,  
88 2018; Weizman et al., 2019). Furthermore, an organ-wide single cell RNA sequencing  
89 (scRNA-seq) analysis reveals that liver  $7R^-$  ILC1s represent a unique population distinct from  
90 SG and small intestines (McFarland et al., 2021), suggesting the absence of universal  
91 differentiation programs of ILC1s conserved across tissues. Thus, concepts of ILC1  
92 heterogeneity and development are still controversial.

93 Additionally, environmental factors regulating ILC1 development are poorly  
94 understood. Accumulating evidence has shown that development and maintenance of ILCs are  
95 strictly associated with their resident tissue microenvironment, called niche (Ikuta et al., 2021;  
96 McFarland and Colonna, 2020; Murphy et al., 2022). G1-ILC homeostasis heavily depends on  
97 interleukin 15 (IL-15), that is transpresented from hematopoietic and stromal cells as an IL-  
98 15/IL-15R $\alpha$  complex to locally promote the development, survival, and proliferation of  
99 memory CD8 T cells, NKT cells, and G1-ILCs in various tissues (Ikuta et al., 2021; Klose et  
100 al., 2014; Lodolce et al., 1998). However, how tissue environment regulates ILC1  
101 homeostasis and whether specific niches control the formation of ILC1 heterogeneity are yet  
102 to be characterized.

103 Based on fate-mapping, transfer studies, and targeting of the IL-15-producing  
104 microenvironment, we have addressed the developmental processes of heterogenous ILC1  
105 subsets. Adult liver (AL)  $7R^+$  ILC1s are not converted to  $7R^-$  ILC1s *in vivo* and ROR $\alpha$   
106 deficiency results in selective reduction of  $7R^+$  ILC1s, suggesting that  $7R^+$  ILC1s are not  
107 necessary for the development of  $7R^-$  ILC1s. FL G1-ILCs originate from perivascular sites of  
108 the liver and then infiltrate into sinusoids to give rise to AL  $7R^-$  ILC1s. Hepatocyte-derived  
109 IL-15 supports FL G1-ILCs development in parenchyma, thereby maintaining mature  $7R^-$   
110 ILC1s in sinusoids. Functionally,  $7R^-$  ILC1s exert inflammation-independent cytotoxicity  
111 through granzyme B expression, which is underpinned by their tonic mTOR activity. Our  
112 findings reveal that  $7R^-$  ILC1s represent an ILC subset with unique developmental processes  
113 and unconventional native cytotoxicity distinct from NK cells and  $7R^+$  ILC1s.

114

## 115 **Results**

116

### 117 **Fetal and adult liver contain *bona fide* ILC1s lacking IL-7R**

118 To characterize and make the relationships among fetal and adult G1-ILCs clear, we first  
119 assessed their expression of NK- and ILC-signature molecules. FL G1-ILCs, adult tissue  
120 ILC1s, and NK cells were identified as CD49a<sup>+</sup>CD49b<sup>int</sup>, CD49a<sup>+</sup>CD49b<sup>lo</sup>, and  
121 CD49a<sup>-</sup>CD49b<sup>+</sup> populations within G1-ILCs, respectively (Figure 1A). FL G1-ILCs highly  
122 expressed CXCR6, TRAIL, and CD200R, resembling adult tissue ILC1s, though they  
123 completely lacked IL-7R expression (Figure 1B and 1C). AL contains both IL-7R-negative  
124 (7R<sup>-</sup>) and -positive (7R<sup>+</sup>) ILC1s (Figure 1C), as reported previously (Friedrich et al., 2021;  
125 Sparano et al., 2022; Yomogida et al., 2021). In contrast, CD49a<sup>+</sup>CD49b<sup>lo</sup> ILC1s in bone  
126 marrow (BM), corresponding to previously reported immature ILC1s (iILC1s) that have  
127 ability to give rise to liver ILC1s (Klose et al., 2014), were mostly IL-7R<sup>+</sup>, similar to other  
128 tissues including the spleen, mesenteric lymph nodes, peritoneal cavity, and small intestines  
129 (Figure 1C and 1D). Despite the differential IL-7R expression, the frequencies and numbers  
130 of AL 7R<sup>-</sup> and 7R<sup>+</sup> ILC1s were not reduced in IL-7<sup>-/-</sup> mice (Figure 1–figure supplement 1A  
131 and 1B), consistent with the basic property of G1-ILCs of being IL-7-independent (Klose et  
132 al., 2014; Robinette et al., 2017).

133 We further assessed the relevance among G1-ILC subsets by bulk RNA sequencing  
134 (RNA-seq). All analyzed G1-ILC populations expressed *Tbx21* (T-bet) but not *Rorc* (RORγt),  
135 suggesting the lack of ILC3 contamination (Figure 1–figure supplement 1C). Consistent with  
136 surface phenotype, FL G1-ILCs and AL 7R<sup>-</sup> ILC1s as well as BM iILC1s and AL 7R<sup>+</sup> ILC1s  
137 shared high expression of ILC1 signature genes (*P2rx7*, *Zfp683*, and *Cd3g*) and low  
138 expression of NK cell signature genes (*Sell*, *Klra4*, and *Klra8*) (Figure 1E). By contrast, 7R<sup>+</sup>  
139 ILC1s and BM iILC1s showed higher expression of genes related to cytokine responses (*Il7r*,  
140 *Il2ra*, *Icos*, and *Kit*) compared to other G1-ILC subsets (Figure 1–figure supplement 1D).  
141 Conversely, FL G1-ILCs and 7R<sup>-</sup> ILC1s poorly expressed cytokine receptor-related genes  
142 (*Il7r*, *Il18r1*, and *Il18rap*) (Figure 1E) and exhibited less cytokine-responsive characters  
143 (Figure 1–figure supplement 1E). Although FL G1-ILCs were unique in terms of their high  
144 proliferative status (Figure 1–figure supplement 1F and 1G), principal component analysis  
145 (PCA) revealed that the overall transcriptional state of FL G1-ILCs was close to 7R<sup>-</sup> ILC1s  
146 (Figure 1F). 7R<sup>+</sup> ILC1s located rather close to BM iILC1s in PCA, suggesting their cross-  
147 tissue similarity. These results show the transcriptional resemblance between FL G1-ILCs and  
148 AL 7R<sup>-</sup> ILC1s or between BM iILC1s and AL 7R<sup>+</sup> ILC1s.

149           Given the ILC1-like transcriptional programs and T-bet<sup>+</sup>Eomes<sup>-</sup> phenotype of FL  
150 G1-ILCs and AL 7R<sup>-</sup> ILC1s (Figure 1G), they were considered as ILC1s but not NK cells. To  
151 precisely verify their lineage, we performed fate-mapping of ILCPs by using PLZF-GFP-Cre  
152 Rosa26-YFP reporter (PLZF-fm) mice (Constantinides et al., 2014). In these mice, ILCP  
153 progenies including ILC1s, ILC2s, and ILC3s but not LTi or NK cells are preferentially  
154 labeled by YFP, though a certain ratio of blood cells expresses YFP due to the pre-  
155 hematopoietic PLZF expression (Constantinides et al., 2014). To remove this background YFP  
156 labelling, we used chimeric mice reconstituted with YFP<sup>-</sup>Lin<sup>-</sup>Sca1<sup>+</sup>c-Kit<sup>+</sup> (LSK) cells sorted  
157 from BM of PLZF-fm mice. In the chimeric mice, AL 7R<sup>-</sup> and 7R<sup>+</sup> ILC1s as well as other  
158 adult tissue ILC1s prominently expressed YFP (Figure 1H and 1I). A similar trend was  
159 observed when using straight PLZF-fm mice or chimeric mice reconstituted with FL LSK  
160 cells from PLZF-fm mice (Figure 1–figure supplement 1H and 1I). Furthermore, FL G1-ILCs  
161 mostly expressed YFP in straight PLZF-fm mice (Figure 1J), in line with a previous fate-  
162 mapping study of neonatal liver G1-ILCs (Constantinides et al., 2015). Thus, these results  
163 indicate that *bona fide* ILC1s lacking IL-7R are enriched in FL and AL.

164

#### 165 **7R<sup>+</sup> ILC1s minimally contribute to the development of 7R<sup>-</sup> ILC1s**

166 A previous study reported that 7R<sup>+</sup> ILC1s behaved as the precursors of 7R<sup>-</sup> ILC1s when  
167 cultured *in vitro* or transferred into lymphopenic mice (Friedrich et al., 2021). However, in the  
168 liver, while 7R<sup>+</sup> ILC1s were nearly absent in infants and accumulated with age, 7R<sup>-</sup> ILC1s  
169 were predominant in young mice, decreased with age, and eventually depleted (Figure 2A–  
170 2C). These observations suggest that the development and maintenance of 7R<sup>-</sup> ILC1s are  
171 independent from 7R<sup>+</sup> ILC1s in physiological conditions.

172           To test this hypothesis, we first explored whether there were molecular pathways  
173 controlling the development of each ILC1 population individually. RNA-seq revealed that  
174 7R<sup>+</sup> ILC1s highly expressed ROR $\alpha$  and were positively enriched with gene sets “RORA  
175 activates gene expression” relative to 7R<sup>-</sup> ILC1s, based on gene set enrichment analysis  
176 (GSEA) (Figure 2D). We therefore generated ROR $\alpha$ <sup>-/-</sup> mice to test the effect of ROR $\alpha$  for  
177 7R<sup>+</sup> ILC1s. As ROR $\alpha$ <sup>-/-</sup> mice tend to die within four weeks after birth, we analyzed adult  
178 ROR $\alpha$ <sup>+/-</sup> mice or two weeks old ROR $\alpha$ <sup>-/-</sup> mice. 7R<sup>+</sup> ILC1s were significantly reduced in  
179 ROR $\alpha$ <sup>+/-</sup> mice, while NK cells and 7R<sup>-</sup> ILC1s were unchanged (Figure 2E). In ROR $\alpha$ <sup>-/-</sup> mice,  
180 though whole ILC1s were significantly reduced as reported recently (Song et al., 2021), 7R<sup>+</sup>  
181 ILC1s were the subset most apparently affected (Figure 2F). These data suggest that the



182 development of 7R<sup>-</sup> ILC1s do not significantly depend on the presence of 7R<sup>+</sup> ILC1s.

183 To make the developmental relationships between 7R<sup>-</sup> and 7R<sup>+</sup> ILC1s clearer, we  
184 conducted adoptive transfer experiments under physiological conditions by using unirradiated  
185 CD45.1 WT host mice. 7R<sup>-</sup> and 7R<sup>+</sup> ILC1s were isolated from AL, transferred, and the host  
186 liver were analyzed. For at least 2 months, little conversion was observed between 7R<sup>-</sup> and  
187 7R<sup>+</sup> ILC1s (Figure 2G–I). In addition, transferred BM iILC1s gave rise to AL 7R<sup>+</sup> ILC1s but  
188 not to 7R<sup>-</sup> ILC1s (Figure 2–figure supplement 1A and 1B), consistent with their  
189 transcriptional resemblance. However, parabiosis experiments showed that the replacement  
190 rate of AL 7R<sup>+</sup> ILC1s were low (<5%), though significantly higher than that of 7R<sup>-</sup> ILC1s  
191 (Figure 2–figure supplement 1C), suggesting that both ILC1 subsets are tissue-resident. Thus,  
192 whether BM iILC1s actually contribute to AL 7R<sup>+</sup> ILC1 pool is still unclear. To test the  
193 phenotypical stability of ILC1s in inflammatory states, we injected IL-15/IL-15R $\alpha$  complex  
194 repeatedly into host mice that had received CPD-labeled 7R<sup>-</sup> and 7R<sup>+</sup> ILC1s. NK cells and  
195 7R<sup>+</sup> ILC1s proliferated more than 7R<sup>-</sup> ILC1s after the stimulation (Figure 2J), consistent with  
196 their basal Ki-67 expression levels (Figure 1–figure supplement 1G) and properties of  
197 cytokine responsiveness (Figure 1–figure supplement 1E). 7R<sup>-</sup> and 7R<sup>+</sup> ILC1s were stable  
198 even after the IL-15/IL-15R $\alpha$  stimulation (Figure 2K), confirming their stability in activated  
199 states. These results show that 7R<sup>+</sup> ILC1s were rarely converted to 7R<sup>-</sup> ILC1s and not  
200 essential for the development of 7R<sup>-</sup> ILC1s under physiological conditions.

201

### 202 **FL G1-ILCs arise at hepatic parenchyma and give rise to 7R<sup>-</sup> ILC1s in sinusoids**

203 We next address the contribution of FL G1-ILCs to the development of AL 7R<sup>-</sup> ILC1s.  
204 Adoptively transferred FL G1-ILCs differentiated into CD49a<sup>+</sup>CD49b<sup>lo</sup> mature ILC1s in AL  
205 (Figure 3A) and they completely lacked IL-7R (Figure 3B). To confirm the direct contribution  
206 of FL G1-ILCs to the adult pool of 7R<sup>-</sup> ILC1s, we performed fate-mapping experiments using  
207 NKp46-CreERT2 mice (Nabekura and Lanier, 2016) crossed with Rosa26-tdTomato mice.  
208 After tamoxifen injection into pregnant mice at E17.5, liver of neonatal and 4 weeks old pups  
209 were analyzed. TdTomato expression was clearly restricted to IL-7R<sup>-</sup> fractions within  
210 neonatal G1-ILCs and AL ILC1s (Figure 3C–3E, Figure 3–figure supplement 1A), consistent  
211 with previous studies (Chen et al., 2022; Sparano et al., 2022). As shown in these studies,  
212 fate-mapped 7R<sup>-</sup> ILC1s showed a skewed expression of Ly49E/F, though they also contained  
213 Ly49E/F<sup>-</sup> population (20–25%) (Figure 3–figure supplement 1B–1D). Labeling efficiency  
214 was 40% in neonatal IL-7R<sup>-</sup> G1-ILCs and 20% in 7R<sup>-</sup> ILC1s in 4 weeks old mice (Figure 3F  
215 and 3G). These results confirm a direct, albeit partial, contribution of FL G1-ILCs to the adult

216 pool of 7R<sup>-</sup> ILC1s.

217 To investigate the detailed developmental process of FL G1-ILCs and AL ILC1s *in*  
218 *vivo*, we examined their spatiotemporal distributions. In immunostaining analysis, FL G1-  
219 ILCs were identified as NKp46<sup>+</sup> cells in WT mice (Figure 4A). AL NK cells and ILC1s were  
220 identified as NKp46<sup>+</sup>GFP<sup>-</sup> and NKp46<sup>+</sup>GFP<sup>+</sup> cells in CXCR6<sup>GFP/+</sup> mice, respectively (Figure  
221 4B and Figure 5–figure supplement 1A). In E18.5 liver, FL G1-ILCs mostly distributed at  
222 perivascular sites, outside of the sinusoidal lumen (here termed parenchyma) (Figure 4A). In  
223 contrast, over 85% of whole ILC1s and NK cells were within sinusoids in AL (Figure 4B and  
224 4C). Although we could not detect IL-7R expression on ILC1s by immunofluorescence, flow  
225 cytometry (FCM)-based analysis of intravenous (i.v.) CD45.2 staining confirmed similar  
226 intravascular locations of 7R<sup>-</sup> and 7R<sup>+</sup> ILC1s as well as NK cells, T cells, and NKT cells in  
227 AL (Figure 4D and 4E). In contrast, ILC2s were not efficiently labeled by i.v. staining,  
228 consistent with perivascular localization of liver ILC2s observed so far (Dahlgren et al., 2019).  
229 Interestingly, a population of AL Lin<sup>-</sup>Sca-1<sup>+</sup>Mac-1<sup>+</sup> (LSM) cells, local precursors for ILC1s  
230 (Bai et al., 2021), were also not well labeled by i.v. staining. Thus, there are localization shifts  
231 between ILC1 precursors and mature ILC1s in the liver: FL G1-ILCs and some LSM cells  
232 distribute to parenchyma, whereas AL G1-ILCs including 7R<sup>-</sup> ILC1s reside within sinusoids.  
233 These observations suggest that FL G1-ILCs arise at parenchyma and then infiltrate into  
234 sinusoids during maturation toward 7R<sup>-</sup> ILC1s.

235

### 236 **Hepatocyte-derived IL-15 supports the parenchymal development of 7R<sup>-</sup> ILC1s**

237 Given that the possible origins of FL G1-ILCs and 7R<sup>-</sup> ILC1s are liver parenchyma, we asked  
238 the role of parenchymal microenvironments for ILC1 development. Since IL-15,  
239 transpresented as an IL-15/IL-15R $\alpha$  complex, is a local determinant of G1-ILC homeostasis  
240 (Ikuta et al., 2021), we generated IL-15-floxed mice and crossed them with several Cre-driver  
241 lines. Reanalysis of single nuclei RNA-seq (snRNA-seq) data of whole liver cells from Liver  
242 Cell Atlas ([www.livercellatlas.org](http://www.livercellatlas.org)) revealed that *Il15* gene was highly expressed by  
243 macrophages and endothelial cells and, to a lesser extent, by hepatocytes, while *Il15ra*  
244 expression was prominent in hepatocytes (Figure 5A, 5B, and Figure 5–figure supplement  
245 1B). We therefore focused on IL-15 produced by hepatocytes, macrophages, and endothelial  
246 cells. To target parenchymal IL-15, we generated Alb-Cre IL-15-flox/flox (f/f) mice (IL-15<sup>Alb-</sup>  
247 <sup>Cre</sup> mice), which lacked IL-15 in hepatocytes. In IL-15<sup>Alb-Cre</sup> mice, FL G1-ILCs were  
248 significantly reduced (Figure 5C). Notably, IL-15<sup>Alb-Cre</sup> mice also showed reduction of AL



249  $7R^-$  ILC1s in contrast to unchanged NK cells,  $7R^+$  ILC1s, and NKT cells (Figure 5D, 5E, and  
250 Figure 5–figure supplement 1C), despite their similar intravascular localizations. These data  
251 corroborate the precursor-progeny relationship of FL G1-ILCs and AL  $7R^-$  ILC1s and also  
252 the parenchymal origin of  $7R^-$  ILC1s. To further define the IL-15 niches for G1-ILCs, we  
253 generated IL-15<sup>Lyve1-Cre</sup> mice, which target vascular IL-15 sources including sinusoidal  
254 endothelial cells and a fraction of hematopoietic cells (Lim et al., 2018; Pham et al., 2010). In  
255 IL-15<sup>Lyve1-Cre</sup> mice, all AL G1-ILC subsets were significantly reduced (Figure 5F). We  
256 analyzed another mouse line targeting intravascular IL-15 sources, IL-15<sup>LysM-Cre</sup> mice, which  
257 lack IL-15 in myeloid cells. IL-15<sup>LysM-Cre</sup> mice showed similar two-fold reductions of AL NK  
258 cells,  $7R^-$  ILC1s, and  $7R^+$  ILC1s (Figure 5G), confirming the similar IL-15 requirements  
259 among all G1-ILC subsets. Notably, expression of Bcl-2, a survival factor downstream of IL-  
260 15, was downregulated in all G1-ILCs of IL-15<sup>Lyve1-Cre</sup> mice (Figure 5H and 5I), whereas Bcl-  
261 2 and Ki-67 levels were unchanged in IL-15<sup>Alb-Cre</sup> mice (Figure 5J and 5K). These results  
262 indicate that parenchymal IL-15 has no direct impact on mature  $7R^-$  ILC1s in sinusoids  
263 whereas intravascular IL-15 directly supports the survival of all AL G1-ILCs. IL-15<sup>Alb-Cre</sup>  
264 mice had reduced Lin<sup>-</sup>CD122<sup>+</sup>CD49a<sup>+</sup> ILC1 precursors in AL (Figure 5–figure supplement  
265 1D), suggesting an impaired development of  $7R^-$  ILC1s. Thus, these data demonstrate that  
266 hepatocyte-derived IL-15 supports the development of  $7R^-$  ILC1s at parenchyma, thereby  
267 maintaining AL  $7R^-$  ILC1s infiltrated in sinusoids.

268

### 269 **Steady-state mTOR activity confers granzyme B-mediated cytotoxicity in $7R^-$ ILC1s**

270 Cytotoxicity is one of the most pivotal functions of G1-ILCs, though the contribution of  
271 ILC1s remains controversial. By focusing on the ILC1 heterogeneity, we attempted to  
272 describe the G1-ILC effector function in detail. In steady state, minimal levels of granzyme B  
273 and death ligands were found on NK cells, while  $7R^-$  ILC1s expressed both granzyme B and  
274 TRAIL, the latter of which was also expressed on  $7R^+$  ILC1s (Figure 6A, Figure 6–figure  
275 supplement 1A, and 1B) (Friedrich et al., 2021). In line with this, freshly isolated  $7R^-$  ILC1s  
276 remarkably lysed multiple tumor cells including YAC-1 (Figure 6B), Hepa1-6 (Figure 6C),  
277 and B16F10 cells (Figure 6D). By contrast, NK cells and  $7R^+$  ILC1s showed only slight or no  
278 cytotoxicity against these tumor cells, consistent with a previous study showing minimal  
279 cytotoxicity of unstimulated NK cells (Fehniger et al., 2007). To determine the effector  
280 pathways  $7R^-$  ILC1s rely on, we added concanamycin A (CMA), an inhibitor for  
281 perforin/granzyme pathways (Kataoka et al., 1994), and neutralizing antibodies for TRAIL  
282 and FasL to the coculture systems. Killing of Hepa1-6 cells by  $7R^-$  ILC1s was markedly

283 inhibited by CMA, and to a lesser extent by anti-TRAIL antibody (Figure 6E). Despite the  
284 expression of granzyme A in NK cells and granzyme C in 7R<sup>+</sup> ILC1s (Nixon et al., 2022)  
285 (Figure 6–figure supplement 1C and 1D), CMA had no effect to their cytotoxicity. Other  
286 granzyme genes (*Gzmf*, *k*, *n*, and *m*) were undetectable in ILC1s (data not shown). These  
287 results suggest that granzyme B plays a major role in the cytotoxicity of 7R<sup>-</sup> ILC1s.

288 Cellular amount of granzyme B is well correlated to and primarily responsible for the  
289 NK cell cytotoxicity (Bhat and Watzl, 2007; Gwalani and Orange, 2018; Prager et al., 2019).  
290 Although granzyme B expression and killing capacity of NK cells are weak at steady state,  
291 stimulation by cytokines, especially by IL-15, enable to induce both of them (Fehniger et al.,  
292 2007; Marçais et al., 2014; Prager et al., 2019). To test whether 7R<sup>-</sup> ILC1s share such an  
293 activation machinery, we analyzed their granzyme B expression after the stimulation. We  
294 found that IL-15/IL-15R $\alpha$  injection more efficiently enhanced granzyme B on NK cells and  
295 7R<sup>+</sup> ILC1s than 7R<sup>-</sup> ILC1s, and thereby the granzyme B level on NK cells got comparable to  
296 7R<sup>-</sup> ILC1s (Figure 6A). IL-15/IL-15R $\alpha$  also triggered the phosphorylation of STAT5, Akt,  
297 and ribosomal protein S6 (a target of mTOR), which are critical for the IL-15-induced effector  
298 function (Ali et al., 2015), in NK cells and 7R<sup>+</sup> ILC1s but to a lesser degree in 7R<sup>-</sup> ILC1s  
299 (Figure 6F, 6G, Figure 6–figure supplement 1E, and 1F). These data suggest that the cytotoxic  
300 capacity of 7R<sup>-</sup> ILC1s are different from that of NK cells in terms of responsiveness and  
301 requirement for the cytokine stimulation. Interestingly, the phosphorylation level of S6 was  
302 rather higher in ILC1s than NK cells in unstimulated mice (Figure 6F and 6G). Notably,  
303 injection of rapamycin, an mTOR complex inhibitor, downregulated granzyme B expression  
304 in 7R<sup>-</sup> ILC1s to a level comparable to that in NK cells (Figure 6H and 6I). By contrast,  
305 granzyme B levels in NK cells and 7R<sup>+</sup> ILC1s were unaffected. Collectively, these results  
306 show that 7R<sup>-</sup> ILC1s exhibit cytotoxicity in their steady state through granzyme B expression,  
307 which is supported by their constitutive mTOR activation.

308

## 309 Discussion

310

311 In this study, we have characterized the developmental process and functional heterogeneity  
312 of liver G1-ILCs. Hepatocytes shape IL-15 niches supporting parenchymal development of  
313 FL G1-ILCs, that differentiate into  $7R^-$  ILC1s in sinusoids. Functionally,  $7R^-$  ILC1s exhibit  
314 granzyme B-mediated cytotoxicity in steady state, in sharp contrast to less cytotoxic resting  
315 NK cells.

316 ILC1 heterogeneity has been extensively addressed recently. In the liver, ILC1s are  
317 separated into  $IL-7R^-$  and  $IL-7R^+$  populations (Friedrich et al., 2021; Sparano et al., 2022;  
318 Yomogida et al., 2021), the latter of which can differentiate into the former when cultured *in*  
319 *vitro* or transferred into lymphopenic mice (Friedrich et al., 2021). However, we show that  
320  $7R^-$  and  $7R^+$  ILC1s behave like independent subsets under physiological conditions: decline  
321 of  $7R^-$  ILC1s and accumulation of  $7R^+$  ILC1s with age, requirements for ROR $\alpha$  specifically  
322 in  $7R^+$  ILC1s, and phenotypical stability between  $7R^-$  and  $7R^+$  ILC1s when transferred into  
323 WT host mice. Such a contradiction might be due to the highly nutrient- and cytokine-  
324 accessible environments in the culture systems and lymphopenic hosts that might trigger non-  
325 physiological activation and phenotypic shift of  $7R^+$  ILC1s. Indeed, our model rather gives an  
326 explanation for the ILC1 heterogeneity in inflammatory disease models using healthy mice  
327 observed so far. In mouse models of contact hypersensitivity, MCMV infection, and liver  
328 injury, ILC1s with high expression of cytokine receptors (IL-7R, CD25, and/or IL-18R)  
329 highly proliferate and accumulate in AL, thereby forming the memory and protecting liver  
330 from infection and injury (Nabekura et al., 2020; Wang et al., 2018; Weizman et al., 2019).  
331 AL  $7R^+$  ILC1s resemble such “memory-like” or “activated” ILC1s in terms of the surface  
332 phenotype and high proliferation potentials. These observations suggest a hypothesis that a  
333 preferential proliferation of pre-existing stable  $7R^+$  ILC1s, rather than inflammation-specific  
334 ILC1s induced from naïve ILC1s, may contribute to liver immunity and homeostasis.

335 Several previous studies have pointed out the precursors for ILC1s: BM iILC1s  
336 (Klose et al., 2014), FL G1-ILCs (Constantinides et al., 2015; Daussy et al., 2014), and local  
337 precursors in the liver such as LSM cells and  $Lin^-CD122^+CD49a^+$  cells (Bai et al., 2021). In  
338 particular, FL G1-ILCs are precursors for AL  $Ly-49E^+$  ILC1s (Chen et al., 2022; Sparano et  
339 al., 2022). Although AL  $Ly-49E^+$  ILC1s are included in and account for 30–40% of AL  $7R^-$   
340 ILC1s, fate-mapping reveals that FL-derived  $7R^-$  ILC1s contain also an  $Ly49E/F^-$  population  
341 (20–25%), suggesting further heterogeneity in FL-derived ILC1s. Considering the partial  
342 contribution (about 50%) of FL G1-ILCs to AL  $7R^-$  ILC1 pool estimated by fate-mapping,

343 local ILC1 precursors such as LSM cells and  $\text{Lin}^- \text{CD122}^+ \text{CD49a}^+$  cells might be the other  
344 sources for  $7\text{R}^-$  ILC1s. By contrast, the origin of AL  $7\text{R}^+$  ILC1s remains to be solved. We  
345 show that BM iILC1s have a potential to differentiate into AL  $7\text{R}^+$  ILC1s, but the actual  
346 contribution is unclear. As both AL  $7\text{R}^-$  and  $7\text{R}^+$  ILC1s were rarely replaced during  
347 parabiosis experiments using adult mice, it is possible that a transiently migrated population  
348 derived from BM settle and give rise to  $7\text{R}^+$  ILC1s in the liver during neonatal period, as  
349 discussed previously (Sparano et al., 2022). Further investigations using a specific tracing  
350 approach such as fate-mapping of BM iILC1s are required to determine their precise  
351 developmental potency.

352 Development and maintenance of ILCs strictly depend on their resident tissue  
353 microenvironments, called niche (Ikuta et al., 2021; Kotas and Locksley, 2018; McFarland  
354 and Colonna, 2020; Murphy et al., 2022). IL-15 is a cytokine crucial for G1-ILC homeostasis.  
355 IL-15-producing cells shape the niches for G1-ILCs within various tissues via the IL-15/IL-  
356  $15\text{R}\alpha$  transpresentation (Cepero-Donates et al., 2016; Cui et al., 2014; Liou et al., 2014;  
357 Mortier et al., 2009), yet IL-15 niches specific for ILC1s remained unclear. Using a  
358 combination of imaging and cell-specific IL-15 knockout approaches, we unveil the  
359 parenchymal origins of  $7\text{R}^-$  ILC1s as well as FL G1-ILCs and identify hepatocytes as an IL-  
360 15-producing niche supporting  $7\text{R}^-$  ILC1 development. Parenchymal distribution of FL G1-  
361 ILCs, reminiscent of FL hematopoietic stem cells (HSCs) (Khan et al., 2016; Lewis et al.,  
362 2021), might be partly due to the immaturity of hepatic vasculature in that period. Since FL  
363 G1-ILCs and FL HSCs are also similar in that they eventually infiltrate into blood vessels  
364 (Lewis et al., 2021), it would be of interest to address the mechanism underlying their  
365 neonatal dynamics. In addition, it is still unclear why hepatocyte-derived IL-15 has such a  
366 local effect despite many fenestrae and the lack of a basement membrane on liver sinusoids.  
367 One possible explanation is that the transpresentation of IL-15/IL- $15\text{R}\alpha$  by hepatocytes may  
368 require direct contact to target cells, as dendritic cells do (Mortier et al., 2008). Given that  
369 hepatocytes prominently express *Il15ra* gene and its deletion results in the reduction of whole  
370 IL-15-dependent lymphocytes in the liver (Cepero-Donates et al., 2016), it is also possible  
371 that hepatocytes may produce IL- $15\text{R}\alpha$  as a soluble form, that binds to other cell-derived IL-  
372 15 to exert non-local effects.

373 Traditionally, ILC1s are regarded as less cytotoxic than NK cells in mice, whereas  
374 recent studies have challenged this theory (Dadi et al., 2016; Di Censo et al., 2021; Kansler et  
375 al., 2022; Nixon et al., 2022; Yomogida et al., 2021). Our study provides two possible

376 explanations for this discrepancy. First, the age of mice selected for analysis influence the  
377 composition and overall cytotoxicity of ILC1s. We and others (Chen et al., 2022; Friedrich et  
378 al., 2021; Nixon et al., 2022) showed that ILC1s were heterogenous in their cytotoxicity. Due  
379 to the age-dependent reduction of highly cytotoxic  $7R^-$  ILC1s, the overall cytotoxicity of  
380 ILC1s in the liver should decline with age. Second, the effector program of  $7R^-$  ILC1s differ  
381 from NK cells in its nature, especially in terms of cytokine responsiveness. Freshly isolated  
382 NK cells exhibit low expression of cytotoxic molecules and only minimal cytotoxicity  
383 (Fehniger et al., 2007), while stimulation by IL-15 confers granzyme B expression and  
384 cytotoxicity on NK cells via mTOR-dependent metabolic reprogramming (Marçais et al.,  
385 2014; Nandagopal et al., 2014). Conversely, we show that  $7R^-$  ILC1s exhibit prominent  
386 granzyme B-mediated cytotoxicity via mTOR activity at steady state, though they are less  
387 responsive to cytokines than NK cells and  $7R^+$  ILC1s. These findings suggest that  $7R^-$  ILC1s  
388 are “ready-to-kill” sentinels that contribute to the tonic immune surveillance, which is  
389 followed later by the response of activated and proliferated NK cells and  $7R^+$  ILC1s.

390 Taken together, our study provides insight into the complex ILC1 ontogeny by  
391 revealing relationships among heterogenous ILC1 subsets, their developmental dynamics, and  
392 niche dependence. Our findings highlight the intrinsic cytotoxic programs of  $7R^-$  ILC1s  
393 unlike NK cells, proposing them as critical steady-state sentinels against infection prevention  
394 and tumor surveillance and bringing the possibility of local therapeutic targeting of ILC1  
395 function.

396

## 397 **Materials and Methods**

398

### 399 **Mice**

400 C57BL/6J mice were purchased from Japan SLC (Hamamatsu, Japan). IL-7<sup>-/-</sup> mice were  
401 obtained by IL-7-flox mice developed in our laboratory (Liang et al., 2012) with Cre-  
402 mediated germ-line deletion. PLZF-IRES-EGFP-Cre (Constantinides et al., 2014) mice were  
403 provided by Dr. M. Miyazaki at Kyoto University and crossed with Rosa26-YFP mice  
404 (Srinivas et al., 2001). ROR $\alpha$  knockout (ROR $\alpha$ <sup>-/-</sup>) mice were generated by CRISPR/Cas9  
405 gene editing in our laboratory and will be reported in detail elsewhere. CXCR6-GFP KI  
406 (CXCR6<sup>GFP/+</sup>) mice were provided by Dr. H. Ohno. IL-15-flox mice were generated in our  
407 laboratory (Cui et al., under review) and bred with Alb-Cre mice (Postic et al., 1999) and  
408 Lyve1-Cre mice (Pham et al., 2010), which were kindly supplied by Dr. Mark A. Magnuson at  
409 Vanderbilt University and by Dr. Jason Cyster at University of California San Francisco,  
410 respectively. NKp46-CreERT2 Tg mice (Nabekura and Lanier, 2016) were provided by Dr. T.  
411 Nabekura and Dr. Lewis L. Lanier and crossed with Rosa26-tdTomato (Madisen et al., 2010)  
412 mice. For fetal experiments, the noon when the vaginal plug was detected was considered as  
413 embryonic day (E) 0.5. All mice were maintained under specific pathogen-free conditions in  
414 the Experimental Research Center for Infectious Diseases at the Institute for Life and Medical  
415 Sciences, Kyoto University. All procedures were carried out under sevoflurane or isoflurane  
416 anesthesia to minimize animal suffering. All mouse protocols were approved by the Animal  
417 Experimentation Committee of the Institute for Life and Medical Sciences, Kyoto University.

418

### 419 **Cell preparation and isolation**

420 To protect ILC1s from NAD<sup>+</sup>-induced cell death (NICD) (Stark et al., 2018), mice were  
421 intravenously (i.v.) injected with 40  $\mu$ g ARTC2.2 blocking nanobody (BioLegend, San Diego,  
422 CA, USA) 30 min before sacrificing the mice in several experiments. Fetal liver, adult liver,  
423 spleen, peripheral (axillary, brachial, and inguinal) lymph nodes, and mesenteric lymph nodes  
424 were dissociated mechanically and passed through 70- $\mu$ m cell strainers (Greiner Bio-One,  
425 Milan, Italy). Adult liver leukocytes were then separated by centrifugation through 40%  
426 Percoll. Peritoneal cavity was washed by 5 mL of PBS and the wash fluid was extracted using  
427 a syringe and a 21 G needle (Terumo Corporation, Tokyo, Japan). BM cells were obtained by  
428 flushing out the marrow fraction of femurs and tibias. To collect salivary gland cells,  
429 submandibular and sublingual glands were minced with scissors and incubated at 37°C for 1



430 hour in RPMI 1640 medium containing 10% fetal bovine serum, 1 mg/mL collagenase D, and  
431 50 µg/mL DNase I (Sigma-Aldrich, St. Luis, MO, USA). The cell suspension was filtered  
432 through a 70-µm cell strainer and purified using 40% Percoll. For the isolation of intestinal  
433 lamina propria lymphocytes, small intestines were flushed out and Peyer's patches were  
434 excised. The intestines were opened longitudinally, cut into 1-cm pieces, and incubated at  
435 37°C for 30 min in PBS with 5 mM EDTA to remove epithelial cells. The incubated pieces  
436 were then minced and digested by RPMI 1640 medium containing 10% fetal bovine serum,  
437 1.25 mg/mL collagenase D, and 50 µg/mL DNase I. The tissue suspension was passed through  
438 a 70-µm cell strainer and lymphocytes were purified by 40% Percoll.

439

#### 440 **Flow cytometry and cell sorting**

441 Following fluorescent dye- or biotin-conjugated antibodies (BioLegend, San Diego, CA,  
442 USA; Thermo Fisher Scientific, Waltham, MA, USA; BD Bioscience, San Jose, CA, USA;  
443 TONBO Biosciences, San Diego, CA, USA) were used: CD3ε (145-2C11), NK1.1 (PK136),  
444 NKp46 (29A1.4), CD49a (HMα1), CD49b (DX5), IL-7Rα (A7R34), CXCR6 (SA051D1),  
445 TRAIL (N2B2), CD69 (H1.2F3), CD200R (OX-110), CXCR3 (CXCR3-173), CD25 (PC61),  
446 Thy-1.2 (30-H12), KLRG1 (2F1/KLRG1), CD11b (M1/70), CD62L (MEL-14), Eomes  
447 (Dan11mag), T-bet (4B10), CD45.1 (A20), CD45.2 (104), CD45 (30-F11), Ki-67 (SolA15),  
448 Bcl-2 (BCL/10C4), CD31 (MEC13.3), LYVE-1 (LVY7), CD122 (TM-β1), Ter119 (Ter119),  
449 F4/80 (BM8), Gr-1 (RB6-8C5), CD19 (6D5), B220 (RA3-6B2), TCRβ (H57-597), FcεRI  
450 (MAR-1), PD-1 (29F.1A12), α4β7 (DATK32), Sca-1 (E13-161.7), c-Kit (2B8), Flt3 (A2F10),  
451 granzyme B (NGZB), granzyme C (SFC1D8), FasL (MFL3), Ly49E/F (CM4), p-S6  
452 (D57.2.2E), p-STAT5 (47), and p-Akt (S473) (M89-61). Biotinylated monoclonal antibodies  
453 were detected with APC- or Brilliant Violet 421-conjugated streptavidin (Thermo Fisher  
454 Scientific). For intracellular staining of Eomes, T-bet, Bcl-2, Ki-67, and granzymes, cells were  
455 stained for surface antigens, fixed, permeabilized, and stained using Foxp3 Staining Buffer  
456 Set or IC Fixation Buffer (Thermo Fisher Scientific). For intracellular staining of p-S6, p-  
457 STAT5, and p-Akt (S473), cells were stained for surface antigens, fixed, permeabilized, and  
458 stained using BD Phosflow Buffer (BD Biosciences). Flow cytometry and cell sorting were  
459 performed on BD FACSVerser or BD LSRFortessa X-20 flow cytometers (BD Biosciences)  
460 and BD FACS Aria II or Aria III cell sorters (BD Biosciences), respectively. Data were  
461 analyzed on FlowJo software (FlowJo, Ashland, OR, USA). Debris and dead cells were  
462 excluded from analysis by forward and side scatter and propidium iodide (PI) gating. In

463 figures, values in quadrants, gated areas, and interval gates indicate percentages in each  
464 population.

465

#### 466 **Fate-mapping experiment**

467 Fate-mapping of ILCPs in BM or FL were performed as described previously (Constantinides  
468 et al., 2014). In brief,  $1 \times 10^4$  YFP<sup>-</sup>Lin<sup>-</sup>Sca1<sup>+</sup>c-Kit<sup>+</sup> (LSK) cells isolated from BM or FL of  
469 PLZF-GFP-Cre Rosa26-YFP mice were injected i.v. into lethally (9 Gy) irradiated CD45.1  
470 WT mice to remove the random YFP labelling occurred prior to the hematopoiesis. The  
471 recipient mice were analyzed 5 weeks after the transplantation. Straight PLZF-GFP-Cre  
472 Rosa26-YFP mice were also analyzed to confirm the results. For fate-mapping of FL G1-ILCs  
473 in NKp46-CreERT2 Rosa26-tdTomato mice, 4 mg tamoxifen (Sigma-Aldrich) was  
474 intraperitoneally injected into pregnant mothers at E17.5. Neonatal (postnatal day 0–4) and 4  
475 weeks old pups were analyzed.

476

#### 477 **RNA sequencing (RNA-seq) and data analysis**

478 For bulk RNA-seq, freshly sorted G1-ILC populations ( $1 \times 10^3$  cells) were lysed with Buffer  
479 RLT (Qiagen, Hilden, Germany) and purified with RNAClean XP (Beckman Coulter, Brea,  
480 CA, USA). Double strand cDNA was synthesized, and sequencing libraries were constructed  
481 using SMART-seq HT Plus kit (Takara Bio, Otsu, Japan). Sequencing was performed with  
482 150 bp paired-end reads on the Illumina HiSeq X sequencer (Illumina, San Diego, CA, USA).  
483 fastp (Chen et al., 2018) was used to assess sequencing quality and to exclude low-quality  
484 reads and adaptor contaminations. Reads were mapped on the mouse reference genome  
485 (mm10) using HiSat2. The read counts were determined at the gene level with featureCounts.  
486 Normalization of gene expression levels and differential gene expression analysis were  
487 performed using DESeq2. Genes were considered as differentially expressed genes (DEG)  
488 when they had an adjusted p ( $p_{adj}$ ) value  $< 0.05$  and fold changes  $> 1.0$ . Metascape (Zhou et  
489 al., 2019) and gene set enrichment analysis (GSEA, Broad Institute) was used for enrichment  
490 analysis. For reanalysis of single nuclei RNA-seq (snRNA-seq) data of whole liver cells in  
491 mice (Liver Cell Atlas; [www.livercellatlas.org](http://www.livercellatlas.org)), normalization, scaling, and UMAP  
492 clustering using first 5 dimensions in principal component analysis (PCA) of scaled count  
493 matrix were performed on R package Seurat 4.0.2.

494

#### 495 ***In vivo* treatment**

496 For *in vivo* stimulation of G1-ILCs, mice were administrated intraperitoneally (i.p.) with 2  $\mu$ g  
497 IL-15/IL-15R $\alpha$  complex (the RLI form as in Mortier et al., 2006, provided by Dr. J. M.  
498 Dijkstra) once a day. After 18 hours, liver cells were isolated and analyzed by flow cytometry  
499 to detect cytotoxic molecule expression. For rapamycin treatment, 30  $\mu$ g rapamycin in 100  $\mu$ L  
500 corn oil was injected i.p. into mice 18 hours before the analysis.

501

### 502 **Intrasplenic injection**

503 A small incision was made on the left flank of anesthetized mice and the lower pole of the  
504 spleen was gently exposed. Cell suspension (50  $\mu$ L) was slowly injected into the spleen by a  
505 0.3 mL insulin syringe with a 29 G needle (BD Biosciences). Cotton wool was applied to the  
506 spleen for several minutes after the injection to stop bleeding.

507

### 508 **Adoptive transfer experiments**

509 NK cells, 7R<sup>-</sup> ILC1s, 7R<sup>+</sup> ILC1s, and BM iILC1s ( $2 \times 10^4$ – $5 \times 10^4$  cells) and FL G1-ILCs ( $1$   
510  $\times 10^5$  cells) were sorted from adult and E18.5 CD45. 1 WT mice, respectively. Each G1-ILC  
511 population was adoptively transferred into CD45.2 WT mice by intrasplenic injection. At the  
512 indicated time points, cells were isolated from the liver of recipient mice and analyzed by  
513 flow cytometry. To assess the stability and the proliferation capacity of 7R<sup>-</sup> ILC1s and 7R<sup>+</sup>  
514 ILC1s in inflammatory conditions, CD45.2 WT mice were injected with indicated G1-ILC  
515 populations labeled by Cell Proliferation Dye (CPD) eFluor 450 (Thermo Fisher Scientific)  
516 (day 0) followed by the administration of 2  $\mu$ g IL-15/IL-15R $\alpha$  at day 1, 3, and 5. After 7 days,  
517 liver leukocytes of recipient mice were analyzed.

518

### 519 **Immunofluorescence**

520 Whole FL of WT mice or hepatic lobes of adult CXCR6-GFP KI mice were fixed with 4%  
521 paraformaldehyde (PFA) at 4°C for 6 hours, embedded in Optimal Cutting Temperature  
522 compound (Sakura Finetechnical, Tokyo, Japan), and sliced with a cryomicrotome (Leica  
523 CM3050S, Wetzlar, Germany). Tissue sections were stained at room temperature for 1 hour  
524 with primary antibodies as follows: biotin-anti-CD31, rabbit polyclonal IgG anti-LYVE-1  
525 (RELIATech, Braunschweig, Germany), and goat polyclonal IgG anti-NKp46 (R&D,  
526 Minneapolis, MN, USA). Following secondary antibodies (BioLegend) were used: Dylight  
527 488 anti-rabbit IgG, Alexa Fluor 555 anti-rabbit IgG, Alexa Fluor 647 anti-goat IgG, Brilliant  
528 Violet 421 anti-rabbit IgG, Dylight 649 anti-rat IgG, and PE anti-rat IgG. Biotinylated

529 antibodies were detected with FITC-, PE-, or Brilliant Violet 421-conjugated streptavidin  
530 (Thermo Fisher Scientific). Stained sections were then mounted using PermaFluor Aqueous  
531 Mounting Medium (Thermo Fisher Scientific) and examined by a TCS SP8 confocal  
532 microscope (Leica) with HC PLAPO CS2 20×/0.75 IMM or HC PLAPO CS2 40×/1.30 OIL  
533 object lenses. Multiple image stacks (10–20  $\mu\text{m}$ ) were acquired with two times of frame  
534 averaging and maximum projection was then performed on using LAS X software (Leica).

535

### 536 **Intravascular staining**

537 PE/Cy7 anti-CD45.2 antibody (clone: 104) (2  $\mu\text{g}$ ) was injected intravenously (i.v.) into mice 2  
538 min before the perfusion and liver dissection. Isolated liver leukocytes were stained with  
539 fluorophore-conjugated antibodies of interest in addition to APC/Cy7 anti-CD45 antibody  
540 (clone: 30-F11) and analyzed by flow cytometry.

541

### 542 **Parabiosis**

543 Female CD45.1 and CD45.2 congenic C57BL/6J mice were surgically conjoined as  
544 previously described (Gasteiger et al., 2015). In brief, lateral skin from elbow to knee of each  
545 mouse was sutured, forelimbs and hindlimbs were tied together, and the skin incisions were  
546 closed using surgical adhesive. After 60 days of surgery, mice were analyzed by flow  
547 cytometry.

548

### 549 ***In vitro* killing assay**

550 Hepa1-6 cells were purchased from RIKEN BioResource Center (RIKEN BRC, Tsukuba,  
551 Japan). B16F10 cells were provided by Dr. T. Honjo at Kyoto University. These mouse tumor  
552 cell lines were maintained in Dulbecco's modified Eagle's medium (DMEM) supplemented  
553 with 10% FBS, 2 mM L-glutamine, and antibiotics. For time-lapse killing assays,  $2 \times 10^2$   
554 Hepa1-6 cells or B16F10 cells were labeled by CPD eFluor 450 and pre-incubated with RPMI  
555 1640 medium (without phenol red) containing 10% FBS, 10 mM HEPES (pH7.4), antibiotics,  
556 and 1  $\mu\text{g}/\text{mL}$  PI on 96-well round bottom plates. Freshly sorted liver NK cells,  $7\text{R}^-$  ILC1s, or  
557  $7\text{R}^+$  ILC1s ( $2 \times 10^3$  cells) were added to the plates and co-cultured with tumor cells. Time-  
558 lapse imaging was performed using a BZ-X710 microscope (Keyence, Osaka, Japan) with  
559 CFI Plan Apo  $\lambda$  10× and CFI Plan Fluor DL 10× objective lenses at a 20 min interval for up  
560 to 6 hours. To determine the contribution of effector molecules, 50 nM concanamycin A  
561 (CMA), 10  $\mu\text{g}/\text{mL}$  anti-TRAIL antibody (N2B2), or 10  $\mu\text{g}/\text{mL}$  anti-FasL antibody (MFL3)

562 were supplemented and compared to vehicle-supplemented controls. Tumor cell viability was  
563 defined by the ratio of the CPD<sup>+</sup>PI<sup>-</sup> viable tumor cell number at each time point to the viable  
564 tumor cell number at the beginning of the imaging and represented as the moving average of  
565 three consecutive time points. Image analysis and cell counts were performed using BZ-X  
566 Analyzer (Keyence). For killing assay of YAC-1 cells (provided by Dr. M. Hattori at Kyoto  
567 University),  $2 \times 10^4$  freshly sorted liver NK cells, 7R<sup>-</sup> ILC1s, or 7R<sup>+</sup> ILC1s were co-cultured  
568 for 4 hours with  $2 \times 10^3$  CPD eFluor 450-labeled YAC-1 cells in RPMI 1640 medium  
569 containing 10% FBS, 10 mM HEPES (pH7.4), and antibiotics. After culture, YAC-1 cells  
570 were stained with FITC-conjugated Annexin V and PI (MEBCYTO-Apoptosis Kit, MBL) and  
571 the ratio of Annexin V<sup>+</sup>PI<sup>+</sup> apoptotic cells were analyzed by flow cytometry.

572

### 573 **Statistical analysis**

574 Statistical differences were evaluated by the two-tailed unpaired Student's *t*-test and one-way  
575 or two-way analysis of variance (ANOVA) using GraphPad Prism 8 (GraphPad Software, San  
576 Diego, California, USA). Asterisks in all figures indicate as follows: \**p* < 0.05, \*\**p* < 0.01,  
577 \*\*\**p* < 0.001, and \*\*\*\**p* < 0.0001.

578

579 **Acknowledgments**

580

581 We acknowledge Dr. Lewis L. Lanier for providing NKp46-CreERT2 mice, Dr. Mark A.  
582 Magnuson for Alb-Cre mice, Dr. Jason Cyster for Lyve1-Cre mice, and members of the K.  
583 Ikuta laboratory for discussion and supervision. Time-lapse imaging using Keyence BZ-X710  
584 microscope were performed at the Medical Research Support Center, Graduate School of  
585 Medicine, Kyoto University, which was supported by Platform for Drug Discovery,  
586 Informatics, and Structural Life Science from the Ministry of Education, Culture, Sports,  
587 Science and Technology, Japan.

588

589 Funding: This research was supported by the Japan Society for the Promotion of Science  
590 (JSPS) KAKENHI grant numbers 20H03501 and 20K21525 (K.I.), 19K16687 and 21K07067  
591 (G.C.). It is also supported by a grant from Takeda Science Foundation to A.S., by grants from  
592 the Shimizu Foundation for Immunology and Neuroscience to T.A. and A.S., and by the Joint  
593 Usage/Research Center program of Institute for Life and Medical Sciences Kyoto University.

594

595 Author contributions: T.A., S.A., G.C., and K.I. designed the research. T.A., S.A., G.C., A.S.,  
596 and K.O. performed the animal experiments, flow cytometry, and analyzed the data. T.N.,  
597 A.S., and M.M. designed and supervised fate-mapping studies. H.M. and S.K. performed the  
598 surgery of parabiosis and cesarean section of mice. J.D. contributed to *in vivo* stimulation  
599 experiments using IL-15/IL-15R $\alpha$ . H.O. supported immunofluorescence experiments. T.A.  
600 and K.I. wrote the manuscript. All authors read and approved the final version of the  
601 manuscript.

602

603 **Competing interests**

604 All authors declare no competing interests.

605

606 **Data availability**

607 All data needed to evaluate the conclusions in the paper are present in the paper. RNA-seq  
608 data generated in this study are deposited in Gene Expression Omnibus (GEO) under  
609 accession code GSE205894.

610

611



612 **References**

- 613
- 614 Ali, A.K., N. Nandagopal, and S.H. Lee. 2015. IL-15-PI3K-AKT-mTOR: a critical pathway in  
615 the life journey of natural killer cells. *Front. Immunol.* 6:355.
- 616 Bai, L., M. Vienne, L. Tang, Y. Kerdiles, M. Etiennot, B. Escalière, J. Galluso, H. Wei, R. Sun,  
617 E. Vivier, H. Peng, and Z. Tian. 2021. Liver type 1 innate lymphoid cells develop  
618 locally via an interferon- $\gamma$ -dependent loop. *Science* 371:eaba4177.
- 619 Bhat, R., and C. Watzl. 2007. Serial killing of tumor cells by human natural killer cells--  
620 enhancement by therapeutic antibodies. *PLoS One* 2:e326.
- 621 Cepero-Donates, Y., V. Rakotoarivelo, M. Mayhue, A. Ma, Y.-G. Chen, and S. Ramanathan.  
622 2016. Homeostasis of IL-15 dependent lymphocyte subsets in the liver. *Cytokine*  
623 82:95-101.
- 624 Chen, S., Y. Zhou, Y. Chen, and J. Gu. 2018. fastp: an ultra-fast all-in-one FASTQ  
625 preprocessor. *Bioinformatics* 34:i884-i890.
- 626 Chen, Y., X. Wang, X. Hao, B. Li, W. Tao, S. Zhu, K. Qu, H. Wei, R. Sun, H. Peng, and Z.  
627 Tian. 2022. Ly49E separates liver ILC1s into embryo-derived and postnatal subsets  
628 with different functions. *J. Exp. Med.* 219:e20211805.
- 629 Constantinides, M.G., H. Gudjonson, B.D. McDonald, I.E. Ishizuka, P.A. Verhoef, A.R.  
630 Dinner, and A. Bendelac. 2015. PLZF expression maps the early stages of ILC1  
631 lineage development. *Proc. Natl. Acad. Sci. USA.* 112:5123-5128.
- 632 Constantinides, M.G., B.D. McDonald, P.A. Verhoef, and A. Bendelac. 2014. A committed  
633 precursor to innate lymphoid cells. *Nature* 508:397-401.
- 634 Cui, G., T. Hara, S. Simmons, K. Wagatsuma, A. Abe, H. Miyachi, S. Kitano, M. Ishii, S.  
635 Tani-Ichi, and K. Ikuta. 2014. Characterization of the IL-15 niche in primary and  
636 secondary lymphoid organs in vivo. *Proc. Natl. Acad. Sci. USA.* 111:1915-1920.
- 637 Dadi, S., S. Chhangawala, B.M. Whitlock, R.A. Franklin, C.T. Luo, S.A. Oh, A. Toure, Y.  
638 Pritykin, M. Huse, C.S. Leslie, and M.O. Li. 2016. Cancer immunosurveillance by  
639 tissue-resident innate lymphoid cells and innate-like T cells. *Cell* 164:365-377.

- 640 Dahlgren, M.W., S.W. Jones, K.M. Cautivo, A. Dubinin, J.F. Ortiz-Carpena, S. Farhat, K.S.  
641 Yu, K. Lee, C. Wang, A.V. Molofsky, A.D. Tward, M.F. Krummel, T. Peng, and A.B.  
642 Molofsky. 2019. Adventitial stromal cells define group 2 innate lymphoid cell tissue  
643 niches. *Immunity* 50:707-722.e706.
- 644 Daussy, C., F. Faure, K. Mayol, S. Viel, G. Gasteiger, E. Charrier, J. Bienvenu, T. Henry, E.  
645 Debien, U.A. Hasan, J. Marvel, K. Yoh, S. Takahashi, I. Prinz, S. de Bernard, L.  
646 Buffat, and T. Walzer. 2014. T-bet and Eomes instruct the development of two distinct  
647 natural killer cell lineages in the liver and in the bone marrow. *J. Exp. Med.* 211:563-  
648 577.
- 649 Di Censo, C., M. Marotel, I. Mattiola, L. Müller, G. Scarno, G. Pietropaolo, G. Peruzzi, M.  
650 Laffranchi, J. Mazej, M.S. Hasim, S. Asif, E. Russo, L. Tomaipitnca, H. Stabile, S.H.  
651 Lee, L. Vian, M. Gadina, A. Gismondi, H.Y. Shih, Y. Mikami, C. Capuano, G.  
652 Bernardini, M. Bonelli, S. Sozzani, A. Diefenbach, M. Ardolino, A. Santoni, and G.  
653 Sciumè. 2021. Granzyme A and CD160 expression delineates ILC1 with graded  
654 functions in the mouse liver. *Eur. J. Immunol.* 51:2568-2575.
- 655 Fehniger, T.A., S.F. Cai, X. Cao, A.J. Bredemeyer, R.M. Presti, R. French, Anthony, and T.J.  
656 Ley. 2007. Acquisition of murine NK cell cytotoxicity requires the translation of a pre-  
657 existing pool of granzyme B and perforin mRNAs. *Immunity* 26:798-811.
- 658 Friedrich, C., R.L.R.E. Taggenbrock, R. Doucet-Ladevèze, G. Golda, R. Moenius, P.  
659 Arampatzi, N.A.M. Kragten, K. Kreymborg, M. Gomez De Agüero, W. Kastenmüller,  
660 A.-E. Saliba, D. Grün, K.P.J.M. Van Gisbergen, and G. Gasteiger. 2021. Effector  
661 differentiation downstream of lineage commitment in ILC1s is driven by Hobit across  
662 tissues. *Nat. Immunol.* 22:1256-1267.
- 663 Gasteiger, G., X. Fan, S. Dikiy, S.Y. Lee, and A.Y. Rudensky. 2015. Tissue residency of innate  
664 lymphoid cells in lymphoid and nonlymphoid organs. *Science* 350:981-985.
- 665 Gwalani, L.A., and J.S. Orange. 2018. Single degranulations in NK Cells can mediate target  
666 cell killing. *J. Immunol.* 200:3231-3243.
- 667 Ikuta, K., T. Hara, S. Abe, T. Asahi, D. Takami, and G. Cui. 2021. The roles of IL-7 and IL-15  
668 in niches for lymphocyte progenitors and immune cells in lymphoid organs. *Curr. Top.*  
669 *Microbiol. Immunol.* 434:83-101.

- 670 Jacquelot, N., C. Seillet, E. Vivier, and G.T. Belz. 2022. Innate lymphoid cells and cancer. *Nat.*  
671 *Immunol.* 23:371-379.
- 672 Kansler, E.R., S. Dadi, C. Krishna, B.G. Nixon, E.G. Stamatziades, M. Liu, F. Kuo, J. Zhang,  
673 X. Zhang, K. Capistrano, K.A. Blum, K. Weiss, R.M. Kedl, G. Cui, K. Ikuta, T.A.  
674 Chan, C.S. Leslie, A.A. Hakimi, and M.O. Li. 2022. Cytotoxic innate lymphoid cells  
675 sense cancer cell-expressed interleukin-15 to suppress human and murine  
676 malignancies. *Nat. Immunol.* 23:904-915.
- 677 Kataoka, T., K. Takaku, J. Magae, N. Shinohara, H. Takayama, S. Kondo, and K. Nagai. 1994.  
678 Acidification is essential for maintaining the structure and function of lytic granules of  
679 CTL. Effect of concanamycin A, an inhibitor of vacuolar type H(+)-ATPase, on CTL-  
680 mediated cytotoxicity. *J. Immunol.* 153:3938-3947.
- 681 Khan, J.A., A. Mendelson, Y. Kunisaki, A. Birbrair, Y. Kou, A. Arnal-Estap e, S. Pinho, P.  
682 Ciero, F. Nakahara, A. Ma'ayan, A. Bergman, M. Merad, and P.S. Frenette. 2016. Fetal  
683 liver hematopoietic stem cell niches associate with portal vessels. *Science* 351:176-  
684 180.
- 685 Klose, C.S.N., M. Flach, L. M ohle, L. Rogell, T. Hoyler, K. Ebert, C. Fabiunke, D. Pfeifer, V.  
686 Sexl, D. Fonseca-Pereira, R.G. Domingues, H. Veiga-Fernandes, S.J. Arnold, M.  
687 Busslinger, I.R. Dunay, Y. Tanriver, and A. Diefenbach. 2014. Differentiation of type 1  
688 ILCs from a common progenitor to all helper-like innate lymphoid cell lineages. *Cell*  
689 157:340-356.
- 690 Kotas, M.E., and R.M. Locksley. 2018. Why innate lymphoid cells? *Immunity* 48:1081-1090.
- 691 Krabbendam, L., J.H. Bernink, and H. Spits. 2021. Innate lymphoid cells: from helper to killer.  
692 *Curr Opin Immunol* 68:28-33.
- 693 Lewis, K., M. Yoshimoto, and T. Takebe. 2021. Fetal liver hematopoiesis: from development  
694 to delivery. *Stem Cell Res. Ther.* 12:139.
- 695 Liang, B., T. Hara, K. Wagatsuma, J. Zhang, K. Maki, H. Miyachi, S. Kitano, C. Yabe-  
696 Nishimura, S. Tani-Ichi, and K. Ikuta. 2012. Role of hepatocyte-derived IL-7 in  
697 maintenance of intrahepatic NKT cells and T cells and development of B cells in fetal  
698 liver. *J. Immunol.* 189:4444-4450.

- 699 Lim, H.Y., S.Y. Lim, C.K. Tan, C.H. Thiam, C.C. Goh, D. Carbajo, S.H.S. Chew, P. See, S.  
700 Chakarov, X.N. Wang, L.H. Lim, L.A. Johnson, J. Lum, C.Y. Fong, A. Bongso, A.  
701 Biswas, C. Goh, M. Evrard, K.P. Yeo, R. Basu, J.K. Wang, Y. Tan, R. Jain, S. Tikoo, C.  
702 Choong, W. Weninger, M. Poidinger, R.E. Stanley, M. Collin, N.S. Tan, L.G. Ng, D.G.  
703 Jackson, F. Ginhoux, and V. Angeli. 2018. Hyaluronan receptor LYVE-1-expressing  
704 macrophages maintain arterial tone through hyaluronan-mediated regulation of smooth  
705 muscle cell collagen. *Immunity* 49:326-341.e327.
- 706 Liou, Y.-H., S.-W. Wang, C.-L. Chang, P.-L. Huang, M.-S. Hou, Y.-G. Lai, G.A. Lee, S.-T.  
707 Jiang, C.-Y. Tsai, and N.-S. Liao. 2014. Adipocyte IL-15 regulates local and systemic  
708 NK cell development. *J. Immunol.* 193:1747-1758.
- 709 Lodolce, J.P., D.L. Boone, S. Chai, R.E. Swain, T. Dassopoulos, S. Trettin, and A. Ma. 1998.  
710 IL-15 receptor maintains lymphoid homeostasis by supporting lymphocyte homing  
711 and proliferation. *Immunity* 9:669-676.
- 712 Madisen, L., T.A. Zwingman, S.M. Sunkin, S.W. Oh, H.A. Zariwala, H. Gu, L.L. Ng, R.D.  
713 Palmiter, M.J. Hawrylycz, A.R. Jones, E.S. Lein, and H. Zeng. 2010. A robust and  
714 high-throughput Cre reporting and characterization system for the whole mouse brain.  
715 *Nat. Neurosci.* 13:133-140.
- 716 Marçais, A., J. Cherfils-Vicini, C. Viant, S. Degouve, S. Viel, A. Fenis, J. Rabilloud, K. Mayol,  
717 A. Tavares, J. Biennu, Y.G. Gangloff, E. Gilson, E. Vivier, and T. Walzer. 2014. The  
718 metabolic checkpoint kinase mTOR is essential for IL-15 signaling during the  
719 development and activation of NK cells. *Nat. Immunol.* 15:749-757.
- 720 McFarland, A.P., and M. Colonna. 2020. Sense and immuno-sensibility: innate lymphoid cell  
721 niches and circuits. *Curr. Opin. Immunol.* 62:9-14.
- 722 McFarland, A.P., A. Yalin, S.Y. Wang, V.S. Cortez, T. Landsberger, R. Sudan, V. Peng, H.L.  
723 Miller, B. Ricci, E. David, R. Faccio, I. Amit, and M. Colonna. 2021. Multi-tissue  
724 single-cell analysis deconstructs the complex programs of mouse natural killer and  
725 type 1 innate lymphoid cells in tissues and circulation. *Immunity* 54:1320-1337.e1324.
- 726 Mortier, E., R. Advincula, L. Kim, S. Chmura, J. Barrera, B. Reizis, B.A. Malynn, and A. Ma.  
727 2009. Macrophage- and dendritic-cell-derived interleukin-15 receptor alpha supports  
728 homeostasis of distinct CD8<sup>+</sup> T cell subsets. *Immunity* 31:811-822.

- 729 Mortier, E., T. Woo, R. Advincula, S. Gozalo, and A. Ma. 2008. IL-15/Ralpha chaperones IL-  
730 15 to stable dendritic cell membrane complexes that activate NK cells via trans  
731 presentation. *J. Exp. Med.* 205:1213-1225.
- 732 Murphy, J.M., L. Ngai, A. Mortha, and S.Q. Crome. 2022. Tissue-dependent adaptations and  
733 functions of innate lymphoid cells. *Front. Immunol.* 13:836999.
- 734 Nabekura, T., and L.L. Lanier. 2016. Tracking the fate of antigen-specific versus cytokine-  
735 activated natural killer cells after cytomegalovirus infection. *J. Exp. Med.* 213:2745-  
736 2758.
- 737 Nabekura, T., L. Riggan, A.D. Hildreth, T.E. O'Sullivan, and A. Shibuya. 2020. Type 1 innate  
738 lymphoid cells protect mice from acute liver injury via interferon- $\gamma$  secretion for  
739 upregulating Bcl-xL expression in hepatocytes. *Immunity* 52:96-108.e109.
- 740 Nandagopal, N., A.K. Ali, A.K. Komal, and S.H. Lee. 2014. The critical role of IL-15-PI3K-  
741 mTOR pathway in natural killer cell effector functions. *Front. Immunol.* 5:187.
- 742 Nixon, B.G., C. Chou, C. Krishna, S. Dadi, A.O. Michel, A.E. Cornish, E.R. Kansler, M.H.  
743 Do, X. Wang, K.J. Capistrano, A.Y. Rudensky, C.S. Leslie, and M.O. Li. 2022.  
744 Cytotoxic granzyme C-expressing ILC1s contribute to antitumor immunity and  
745 neonatal autoimmunity. *Sci. Immunol.* 7:eabi8642.
- 746 Peng, H., X. Jiang, Y. Chen, D.K. Sojka, H. Wei, X. Gao, R. Sun, W.M. Yokoyama, and Z.  
747 Tian. 2013. Liver-resident NK cells confer adaptive immunity in skin-contact  
748 inflammation. *J. Clin. Invest.* 123:1444-1456.
- 749 Pham, T.H.M., P. Baluk, Y. Xu, I. Grigorova, A.J. Bankovich, R. Pappu, S.R. Coughlin, D.M.  
750 McDonald, S.R. Schwab, and J.G. Cyster. 2010. Lymphatic endothelial cell  
751 sphingosine kinase activity is required for lymphocyte egress and lymphatic patterning.  
752 *J. Exp. Med.* 207:17-27.
- 753 Postic, C., M. Shiota, K.D. Niswender, T.L. Jetton, Y. Chen, J.M. Moates, K.D. Shelton, J.  
754 Lindner, A.D. Cherrington, and M.A. Magnuson. 1999. Dual roles for glucokinase in  
755 glucose homeostasis as determined by liver and pancreatic  $\beta$  cell-specific gene knock-  
756 outs using Cre recombinase. *J. Biol. Chem.* 274:305-315.

- 757 Prager, I., C. Liesche, H. van Ooijen, D. Urlaub, Q. Verron, N. Sandström, F. Fasbender, M.  
758 Claus, R. Eils, J. Beaudouin, B. Önfelt, and C. Watzl. 2019. NK cells switch from  
759 granzyme B to death receptor-mediated cytotoxicity during serial killing. *J Exp Med*  
760 216:2113-2127.
- 761 Robinette, M.L., J.K. Bando, W. Song, T.K. Ulland, S. Gilfillan, and M. Colonna. 2017. IL-15  
762 sustains IL-7R-independent ILC2 and ILC3 development. *Nat. Commun.* 8:14601.
- 763 Sojka, D.K., B. Plougastel-Douglas, L. Yang, M.A. Pak-Wittel, M.N. Artyomov, Y. Ivanova,  
764 C. Zhong, J.M. Chase, P.B. Rothman, J. Yu, J.K. Riley, J. Zhu, Z. Tian, and W.M.  
765 Yokoyama. 2014. Tissue-resident natural killer (NK) cells are cell lineages distinct  
766 from thymic and conventional splenic NK cells. *Elife* 3:e01659.
- 767 Song, J., H. Song, H. Wei, R. Sun, Z. Tian, and H. Peng. 2021. Requirement of ROR $\alpha$  for  
768 maintenance and antitumor immunity of liver-resident natural killer cells/ILC1s.  
769 *Hepatology* 75:1181-1193.
- 770 Sparano, C., D. Solís-Sayago, A. Vijaykumar, C. Rickenbach, M. Vermeer, F. Ingelfinger, G.  
771 Litscher, A. Fonseca, C. Mussak, M. Mayoux, C. Friedrich, C. Nombela-Arrieta, G.  
772 Gasteiger, B. Becher, and S. Tugues. 2022. Embryonic and neonatal waves generate  
773 distinct populations of hepatic ILC1s. *Sci. Immunol.* 7:eabo6641.
- 774 Srinivas, S., T. Watanabe, C.-S. Lin, C.M. William, Y. Tanabe, T.M. Jessell, and F. Costantini.  
775 2001. Cre reporter strains produced by targeted insertion of EYFP and ECFP into the  
776 ROSA26 locus. *BMC Dev. Biol.* 1:4.
- 777 Stark, R., T.H. Wesselink, F.M. Behr, N.A.M. Kragten, R. Arens, F. Koch-Nolte, K.P.J.M. van  
778 Gisbergen, and R.A.W. van Lier. 2018. TRM maintenance is regulated by tissue damage  
779 via P2RX7. *Sci. Immunol.* 3:eaau1022.
- 780 Stokic-Trtica, V., A. Diefenbach, and C.S.N. Klose. 2020. NK Cell Development in Times of  
781 Innate Lymphoid Cell Diversity. *Front Immunol* 11:813.
- 782 Vivier, E., D. Artis, M. Colonna, A. Diefenbach, J.P. Di Santo, G. Eberl, S. Koyasu, R.M.  
783 Locksley, A.N.J. Mckenzie, R.E. Mebius, F. Powrie, and H. Spits. 2018. Innate  
784 lymphoid cells: 10 years on. *Cell* 174:1054-1066.



- 785 Wang, X., H. Peng, J. Cong, X. Wang, Z. Lian, H. Wei, R. Sun, and Z. Tian. 2018. Memory  
786 formation and long-term maintenance of IL-7R $\alpha^+$  ILC1s via a lymph node-liver axis.  
787 *Nat. Commun.* 9:4854.
- 788 Weizman, O.E., N.M. Adams, I.S. Schuster, C. Krishna, Y. Pritykin, C. Lau, M.A. Degli-  
789 Esposti, C.S. Leslie, J.C. Sun, and T.E. O'Sullivan. 2017. ILC1 confer early host  
790 protection at initial sites of viral infection. *Cell* 171:795-808.e712.
- 791 Weizman, O.E., E. Song, N.M. Adams, A.D. Hildreth, L. Riggan, C. Krishna, O.A. Aguilar,  
792 C.S. Leslie, J.R. Carlyle, J.C. Sun, and T.E. O'Sullivan. 2019. Mouse  
793 cytomegalovirus-experienced ILC1s acquire a memory response dependent on the  
794 viral glycoprotein m12. *Nat. Immunol.* 20:1004-1011.
- 795 Yomogida, K., T.M. Bigley, T. Trsan, S. Gilfillan, M. Cella, W.M. Yokoyama, T. Egawa, and  
796 M. Colonna. 2021. Hobit confers tissue-dependent programs to type 1 innate lymphoid  
797 cells. *Proc. Natl. Acad. Sci. USA.* 118:e2117965118.
- 798 Yu, Y., J.C.H. Tsang, C. Wang, S. Clare, J. Wang, X. Chen, C. Brandt, L. Kane, L.S. Campos,  
799 L. Lu, G.T. Belz, A.N.J. Mckenzie, S.A. Teichmann, G. Dougan, and P. Liu. 2016.  
800 Single-cell RNA-seq identifies a PD-1<sup>hi</sup> ILC progenitor and defines its development  
801 pathway. *Nature* 539:102-106.
- 802 Zhou, Y., B. Zhou, L. Pache, M. Chang, A.H. Khodabakhshi, O. Tanaseichuk, C. Benner, and  
803 S.K. Chanda. 2019. Metascape provides a biologist-oriented resource for the analysis  
804 of systems-level datasets. *Nat. Commun.* 10:1523.  
805

806 **Figures**

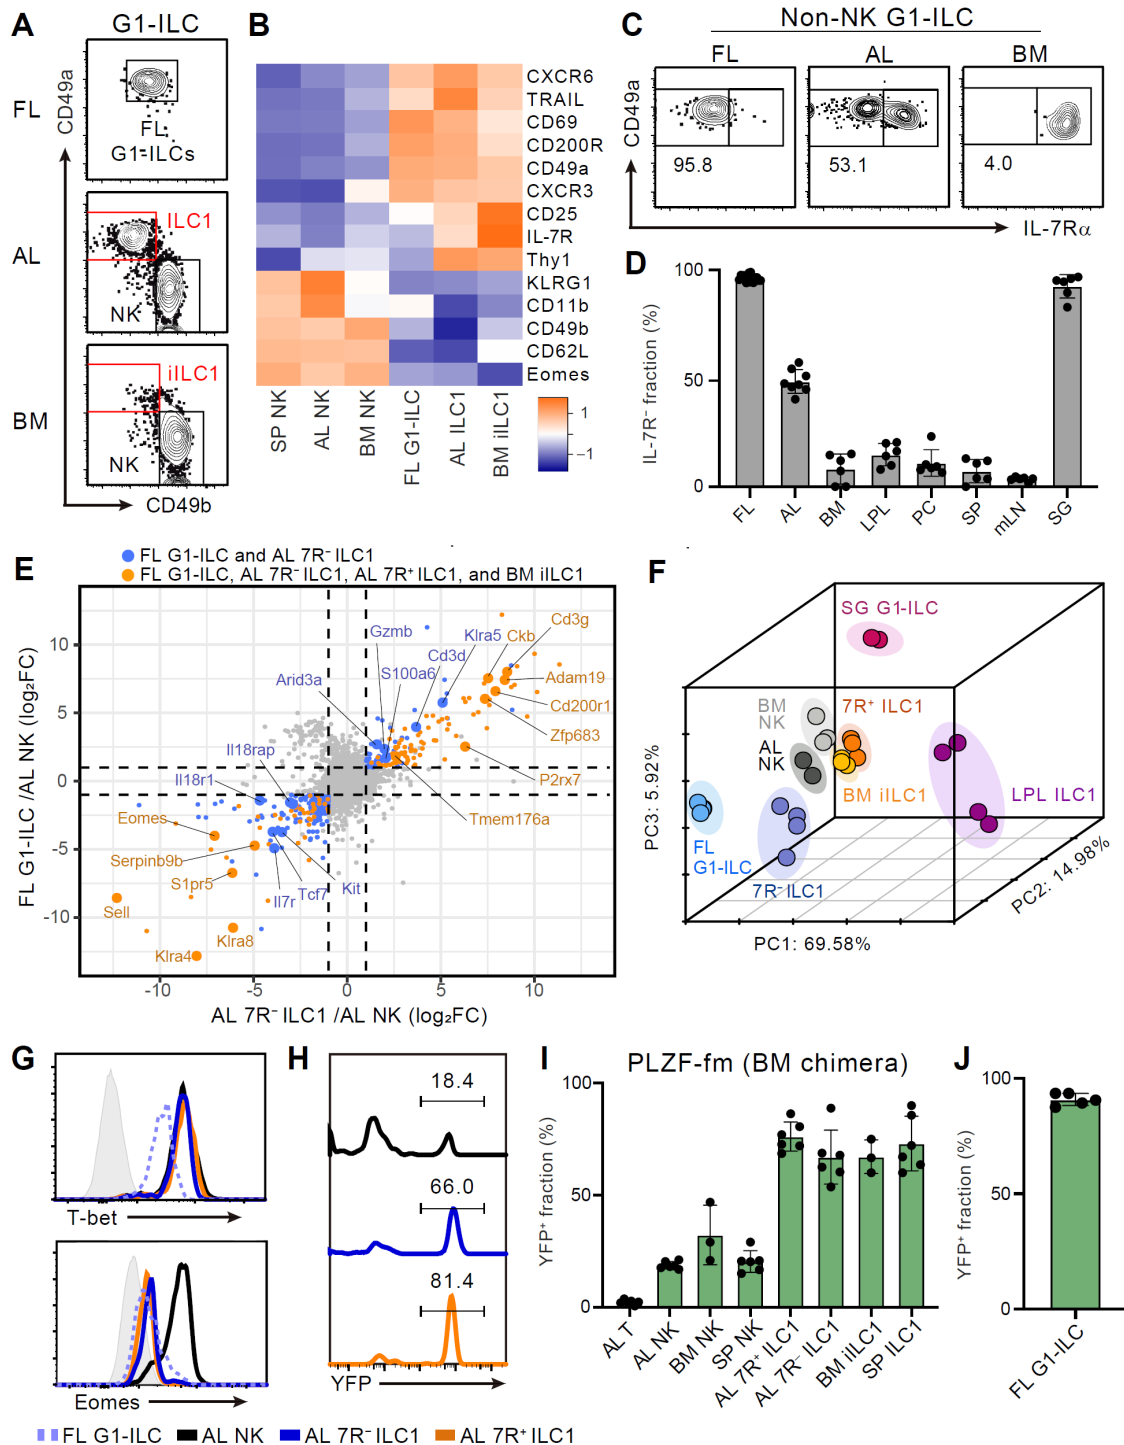

807 **Figure 1. Fetal and adult liver contain *bona fide* ILC1s lacking IL-7R.**

808 (A) Gating strategy of subpopulations of G1-ILCs (CD3<sup>+</sup>NK1.1<sup>+</sup>NKp46<sup>+</sup>) in the E18.5 fetal  
809 liver (FL), adult liver (AL), and bone marrow (BM). iILC1, immature ILC1.

810 (B) Heatmap representing log<sub>2</sub> transformed mean fluorescence intensity (MFI) of indicated  
811 protein expression normalized by z-score transformations. SP, spleen.

812 (C) Expression of IL-7R $\alpha$  on G1-ILCs except for CD49a<sup>-</sup>CD49b<sup>+</sup> NK cells (non-NK G1-  
813 ILCs) in FL, AL, and BM.

814 (D) The percentages of IL-7R<sup>-</sup> fractions in non-NK G1-ILCs in the indicated tissues ( $n = 6$ –  
815 8). LPL, small intestinal lamina propria lymphocytes; PC, peritoneal cavity; mLN, mesenteric  
816 lymph node; SG, salivary gland.

817 (E) Scatter plot showing relative gene expression of FL G1-ILCs and AL 7R<sup>-</sup> ILC1s  
818 compared to AL NK cells in RNA-seq. Genes differentially expressed by FL G1-ILCs, AL  
819 7R<sup>-</sup> ILC1s, AL 7R<sup>+</sup> ILC1s, and BM iILC1s (orange) or only by FL G1-ILCs and AL 7R<sup>-</sup>  
820 ILC1s (blue) compared to AL NK cells are highlighted. FC, fold change.

821 (F) First three principal components in PCA of top 3,000 variant genes.

822 (G) Expression of T-bet (upper) and Eomes (lower) on FL G1-ILCs as well as NK cells, 7R<sup>-</sup>  
823 ILC1s, and 7R<sup>+</sup> ILC1s in AL. Shaded histograms (grey) indicate isotype controls.

824 (H and I) Fate-mapping analysis of adult chimeric mice reconstituted with BM  
825 YFP<sup>-</sup>Lin<sup>-</sup>Sca1<sup>+</sup>c-Kit<sup>+</sup> (LSK) cells from PLZF-GFP-Cre Rosa26-YFP (PLZF-fm) mice.  
826 Representative histograms of YFP expression (H) and the percentages of YFP<sup>+</sup> cells in  
827 indicated cell populations (I) are shown ( $n = 3$ –6).

828 (J) The percentage of YFP<sup>+</sup> cells in FL G1-ILCs in E18.5 straight PLZF-fm mice ( $n = 5$ ).  
829 Data represent at least two independent experiments (A, C, G, and H), are from three to six  
830 biological replicates (B), or are pooled from one (J) or multiple (D and I) independent  
831 experiments. RNA-seq data are from two (AL NK cells and SG G1-ILCs), three (AL 7R<sup>+</sup>  
832 ILC1s, BM iILC1s, and BM NK cells), and four (FL G1-ILCs, AL 7R<sup>-</sup> ILC1s, and LPL  
833 ILC1s) biological replicates (E and F). Data are presented as mean  $\pm$  SD.

834

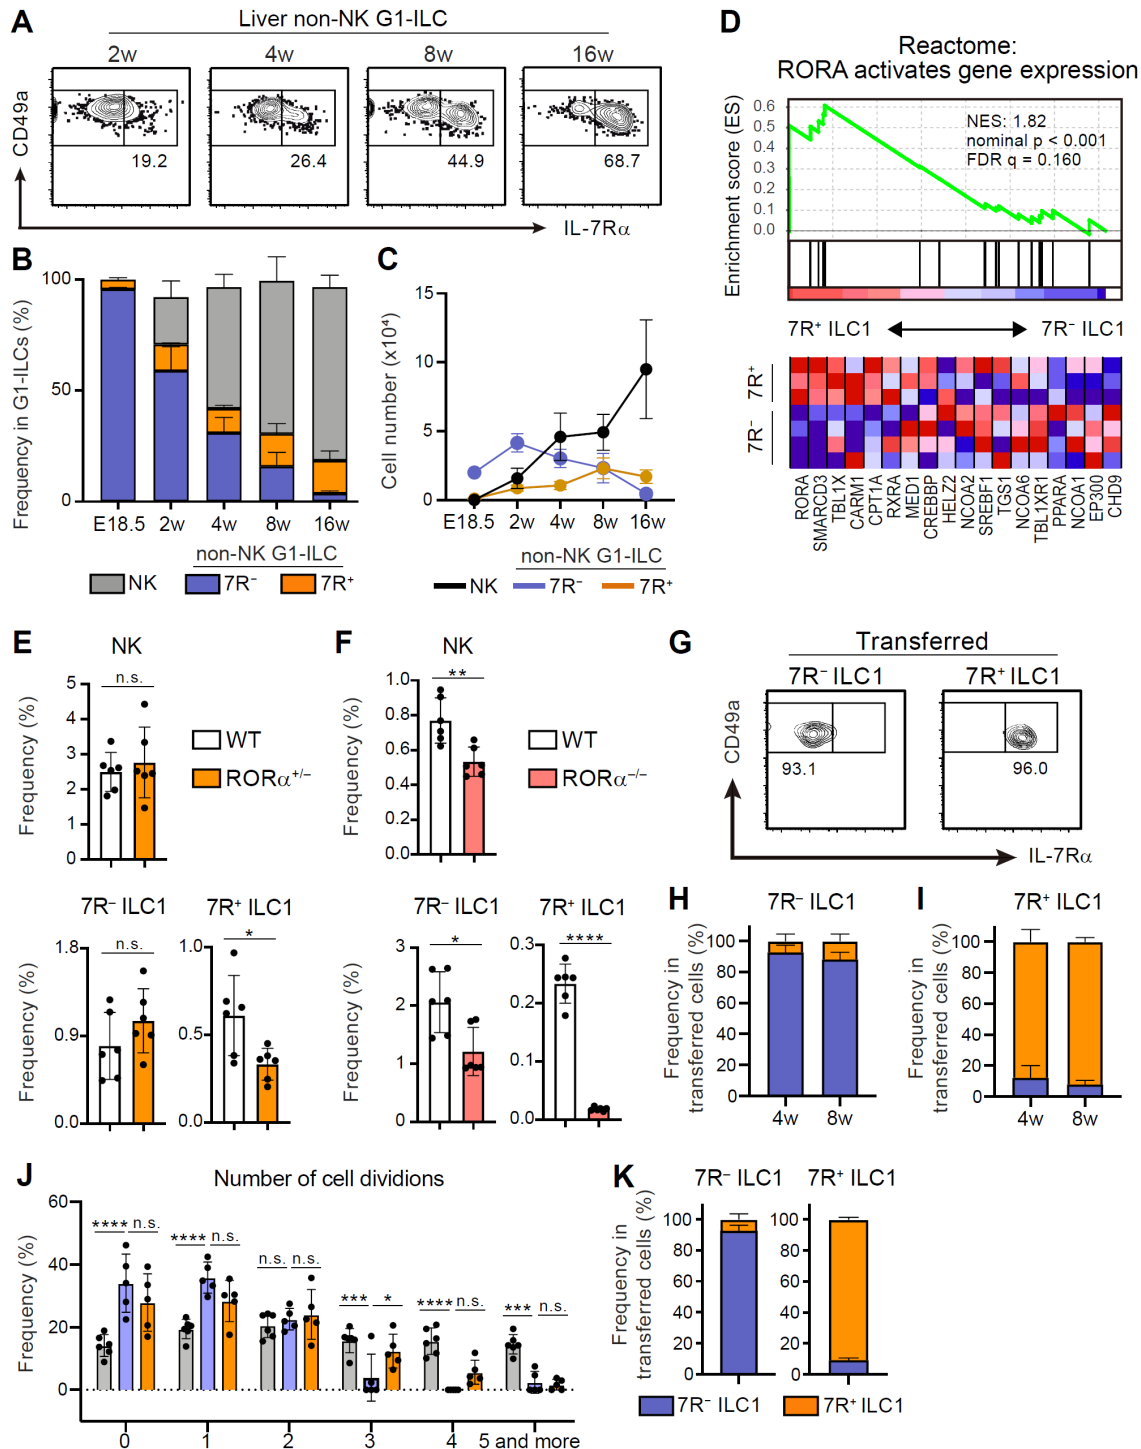

835 **Figure 2. 7R $^+$  ILC1s are dispensable for the development of 7R $^-$  ILC1s in AL.**

836 (A–C) Kinetics of IL-7R $\alpha$  expression on liver non-NK G1-ILCs with age. Representative  
837 FCM profiles (A), the percentages within G1-ILCs (B), and the cell number (C) are shown ( $n$   
838 = 5–11 for each timepoint).

839 (D) GSEA of transcriptomes in 7R $^+$  ILC1s compared to 7R $^-$  ILC1s. Eighteen genes included  
840 in an indicated gene set from Reactome Pathway are shown. The lower heatmap shows

841 relative gene expression levels in AL 7R<sup>-</sup> and 7R<sup>+</sup> ILC1s.  
842 (E) The percentages of AL G1-ILC populations in control or RORα<sup>+/-</sup> mice ( $n = 6$ ).  
843 (F) The percentages of AL G1-ILC populations in control or RORα<sup>-/-</sup> mice ( $n = 6$ ).  
844 (G–I) Flow cytometric (FCM) analysis of transferred AL 7R<sup>-</sup> and 7R<sup>+</sup> ILC1s detected in the  
845 host liver at 4 weeks and 8 weeks post-transfer. Representative FCM profiles (G) and the  
846 percentages of the fate of transferred 7R<sup>-</sup> ILC1s (H) and 7R<sup>+</sup> ILC1s (I) are shown ( $n = 3–6$ ).  
847 (J) Host mice received with CPD-eFluor 450-labeled 7R<sup>-</sup> and 7R<sup>+</sup> ILC1s are repeatedly  
848 stimulated with i.p. injection of IL-15/IL-15Rα complex. The number of transferred cell  
849 division based on the FCM analysis of CPD-eFluor 450 dye dilution ( $n = 5–6$ ) are shown.  
850 (K) The percentages of the fate of transferred AL 7R<sup>-</sup> ILC1s and 7R<sup>+</sup> ILC1s detected in the  
851 liver of host mice injected with IL-15/IL-15Rα complex ( $n = 5–6$ ).  
852 Data are from three (AL 7R<sup>+</sup> ILC1s) and four (AL 7R<sup>-</sup> ILC1s) biological replicates (D),  
853 represent at least two independent experiments (A and G), or are pooled from one (F) and  
854 multiple (B, C, E, H–K) independent experiments. Data are presented as mean ± SD. \* $p <$   
855 0.05, \*\* $p < 0.01$ , \*\*\* $p < 0.001$ , \*\*\*\* $p < 0.0001$ .  
856

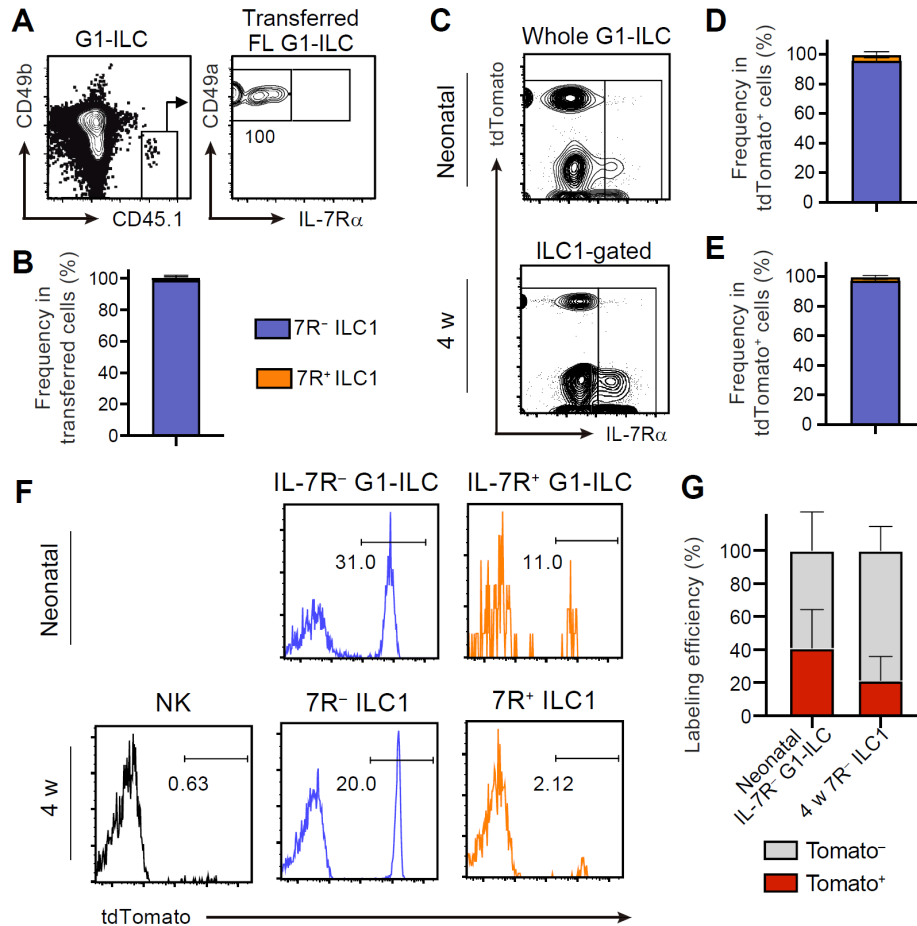

857 **Figure 3. FL G1-ILCs exclusively give rise to 7R $^-$  ILC1s.**

858 (A and B) FCM analysis of transferred FL G1-ILCs (CD45.1) detected in the host liver  
 859 (CD45.2) at 4 weeks post-transfer. Representative FCM profiles (A) and the percentages of  
 860 transferred cell fate (B) are shown ( $n = 4$ ).

861 (C–E) FCM analysis of tdTomato $^+$  cells in neonatal and adult NKp46-CreERT2 Rosa26-  
 862 tdTomato mice treated with tamoxifen at E17.5. Representative FCM plots (C) and the  
 863 percentage of the fate of tdTomato $^+$  cells in neonates (D;  $n = 10$ ) and 4 weeks old mice (E;  $n$   
 864 = 5) are shown. Blue, IL-7R $^-$  fraction; orange, IL-7R $^+$  fraction.

865 (F and G) FCM analysis of tdTomato expression on indicated G1-ILC populations in NKp46-  
 866 Cre Rosa26-tdTomato mice treated with tamoxifen at E17.5. Representative histograms (F)  
 867 and the percentages of tdTomato $^+$  and tdTomato $^-$  fractions in neonatal IL-7R $^-$  G1-ILCs and  
 868 7R $^-$  ILC1s in 4 weeks old mice (G) are shown ( $n = 5$ –10).

869 Data represent at least two independent experiments (A, C, and F). Data are pooled from  
 870 multiple independent experiments (B, D, E, and G) and presented as mean  $\pm$  SD.

871



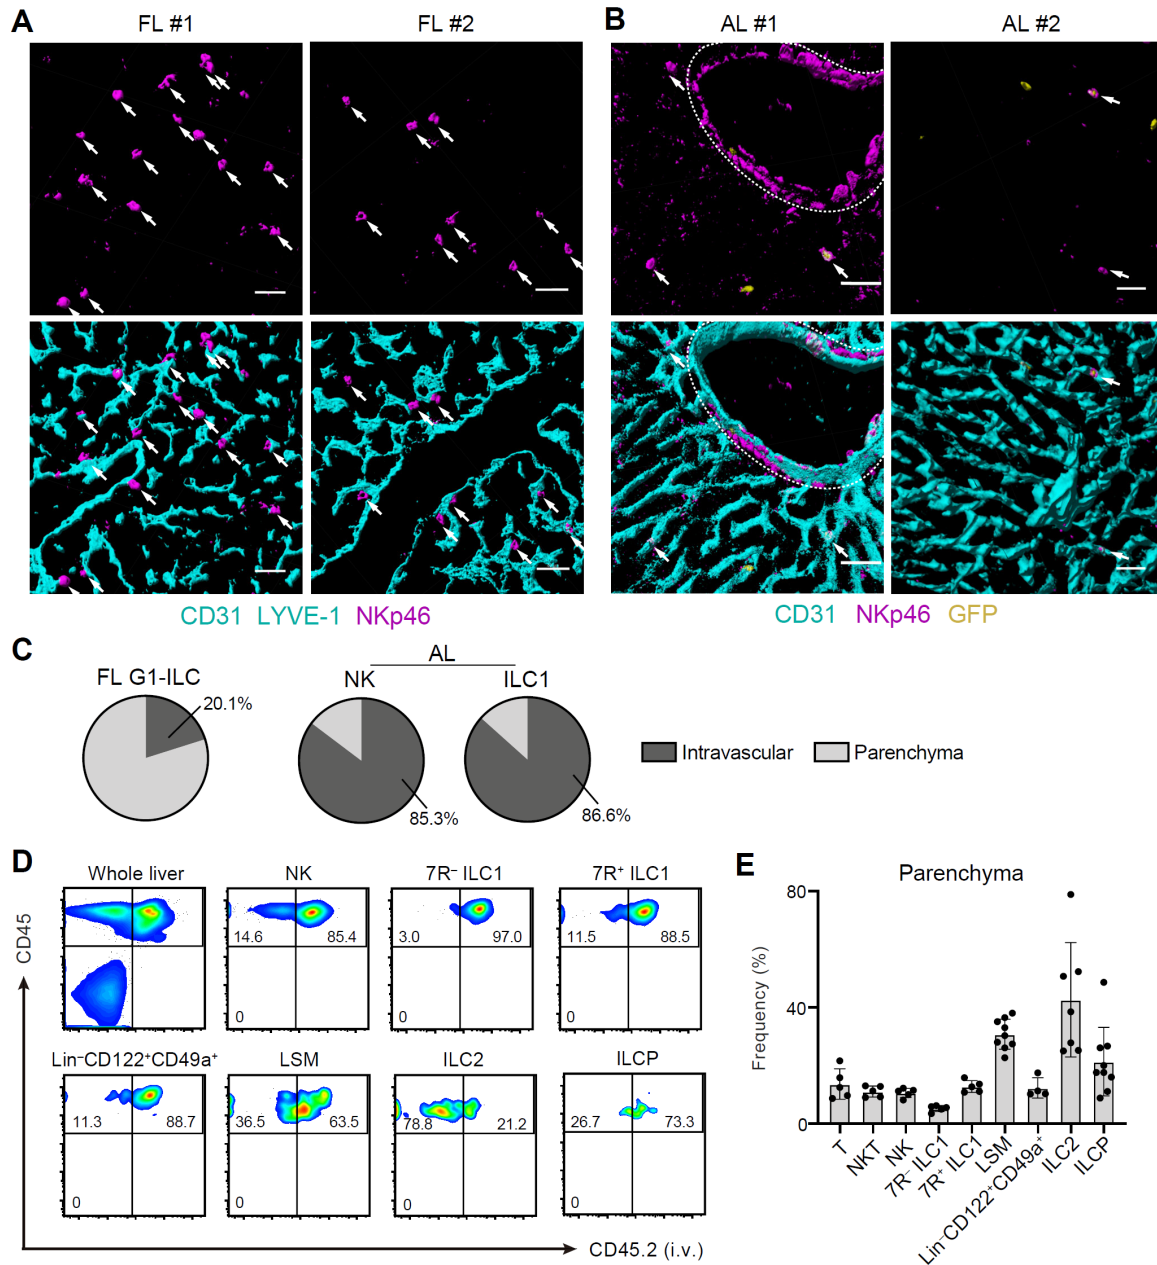

872 **Figure 4. Liver G1-ILCs shift distributions from parenchyma to sinusoids during**  
 873 **development.**

874 (A and B) 3D-reconstructed immunofluorescence images of frozen sections of FL from WT  
 875 mice (A) and AL from CXCR6<sup>GFP/+</sup> mice (B) stained with anti-NKp46 (magenta) and anti-  
 876 CD31 and/or anti-LYVE-1 (for FL endothelium) (cyan) antibodies. GFP signals are shown in  
 877 yellow. White arrows indicate G1-ILCs. Hepatic artery is circled by a dotted line. Scale bar,  
 878 40  $\mu$ m.

879 (C) The percentages of indicated G1-ILC subsets localized inside (intravascular) or outside  
 880 (parenchyma) of the blood vessels. Data represent randomly counted 169 cells for FL G1-  
 881 ILCs pooled from four E18.5 WT mice and 232 cells for AL NK cells as well as 136 cells for

882 AL ILC1s pooled from four CXCR6<sup>GFP/+</sup> mice.  
883 (D and E) FCM analysis of AL of mice injected i.v. with PE/Cy7 anti-CD45.2 antibody 2 min  
884 before the liver perfusion and leukocyte isolation. Representative FCM profiles (D) and the  
885 percentages of cells unlabeled by i.v. CD45.2 staining within CD45<sup>+</sup> cells (considered as  
886 parenchyma-distributed cells) (E) are shown ( $n = 4-9$ ).  
887 Data represent four mice (A and B) or at least two independent experiments (D). Data are  
888 pooled from multiple independent experiments (C and E) and presented as mean  $\pm$  SD.  
889

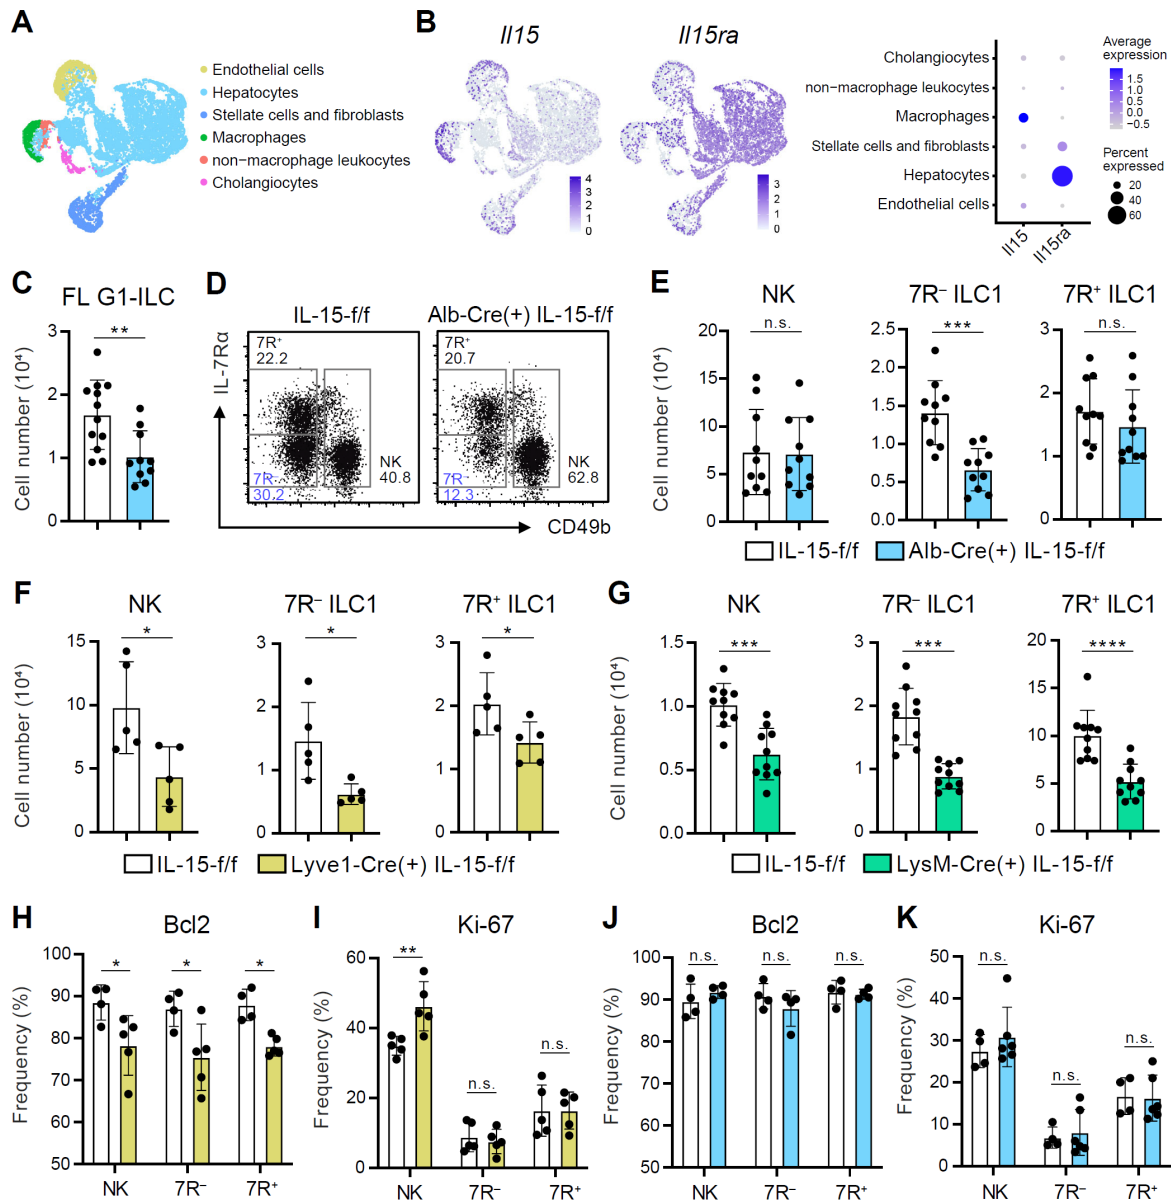

890 **Figure 5. Hepatocytes provide the parenchymal IL-15 niche regulating the local**  
 891 **development of 7R<sup>-</sup> ILC1s.**

892 (A and B) Single nuclei RNA-seq (snRNA-seq) analysis of mouse whole liver cells (Liver  
 893 Cell Atlas; [www.livercellatlas.org](http://www.livercellatlas.org)). UMAP visualization (A) and expression levels of *Il15*  
 894 and *Il15ra* (B) in each cell population assigned in Figure 5-figure supplement 1B are shown.

895 (C) The cell number of FL G1-ILCs in control or IL-15<sup>Alb-Cre</sup> mice ( $n = 10-12$ ).

896 (D and E) FCM analysis of AL G1-ILCs in control or IL-15<sup>Alb-Cre</sup> mice. Representative FCM  
 897 plots (D) and the cell number of each population (E) are shown ( $n = 10$ ).

898 (F and G) The cell number of indicated G1-ILC populations in IL-15<sup>Lyve1-Cre</sup> mice (F;  $n = 5$ )

899 or IL-15<sup>LysM-Cre</sup> mice (G;  $n = 10$ ) compared to controls.

900 (H and I) The percentages of Bcl-2 (H;  $n = 4-5$ ) and Ki-67 (I;  $n = 5$ ) expressing cells within

901 each G1-ILC population in control or IL-15<sup>Lyve1-Cre</sup> mice.  
902 (J and K) The percentages of Bcl-2 (J;  $n = 4$ ) and Ki-67 (K;  $n = 4-6$ ) expressing cells within  
903 each G1-ILC population in control or IL-15<sup>Alb-Cre</sup> mice.  
904 Data represent three independent experiments (D) or are pooled from multiple independent  
905 experiments (C and E-K) and presented as mean  $\pm$  SD. \* $p < 0.05$ , \*\* $p < 0.01$ , \*\*\* $p < 0.001$ ,  
906 \*\*\*\* $p < 0.0001$ .  
907

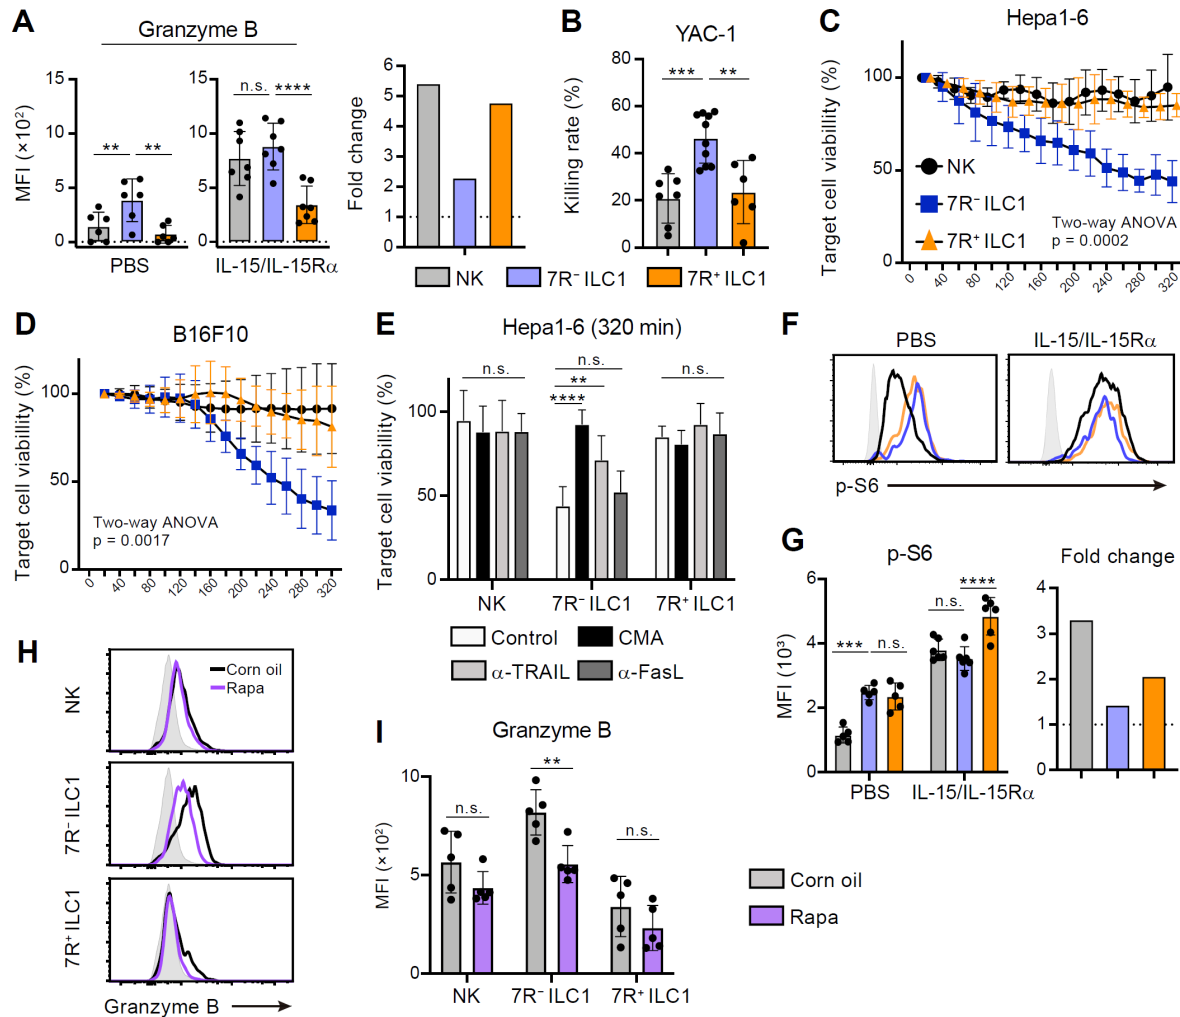

908 **Figure 6. 7R<sup>-</sup> ILC1s exhibit cytotoxicity via granzyme B expression underpinned by**  
 909 **steady-state mTOR activation.**

910 (A) Granzyme B expression on each AL G1-ILC population in control or IL-15/IL-15R $\alpha$ -  
 911 treated mice. MFI (left) and its fold change after the IL-15/IL-15R $\alpha$  treatments (right) are  
 912 shown ( $n = 6-7$ ).

913 (B) The percentages of annexin V<sup>+</sup>PI<sup>+</sup> YAC-1 cells in flow-based cytotoxicity assays. Freshly  
 914 isolated effector cells were co-cultured with target cells for 4 hours (E:T ratio = 10:1) ( $n = 6-$   
 915 10).

916 (C and D) Target cell viability at each timepoint in time-lapse cytotoxicity assay using Hepa1-  
 917 6 cells (C;  $n = 6$ ) and B16F10 cells (D;  $n = 7-8$ ) as target cells. Freshly isolated effector cells  
 918 were co-cultured with target cells up to 6 hours (E:T ratio = 10:1).

919 (E) Hepa1-6 cell viability at 320 min in time-lapse cytotoxicity assays supplemented with  
 920 concanamycin A (CMA) or neutralizing antibody for TRAIL ( $\alpha$ -TRAIL) or FasL ( $\alpha$ -FasL)  
 921 compared to vehicle-supplemented controls ( $n = 6$ ).

922 (F and G) FCM analysis of phosphorylation of S6 in NK cells (black), 7R<sup>-</sup> ILC1s (blue), and  
923 7R<sup>+</sup> ILC1s (orange) in control or IL-15/IL-15R $\alpha$ -treated mice. Representative histograms (F)  
924 and MFI (left) and its fold change after the IL-15/IL-15R $\alpha$  treatments (right) (G) are shown ( $n$   
925 = 5–6). Shaded histograms (grey) indicate isotype controls.

926 (H and I) FCM analysis of granzyme B expressed on each AL G1-ILC population in control  
927 or rapamycin-treated mice. Representative histograms (H) and MFI (I) are shown ( $n$  = 5).  
928 Shaded histograms (grey) indicate isotype controls.

929 Data represent at least two independent experiments (F and H) or are pooled from multiple  
930 independent experiments (A–E, G, and I) and are presented as mean  $\pm$  SD. \*\* $p$  < 0.01, \*\*\* $p$  <  
931 0.001, \*\*\*\* $p$  < 0.0001.

932

933



934 **Figure Supplements**

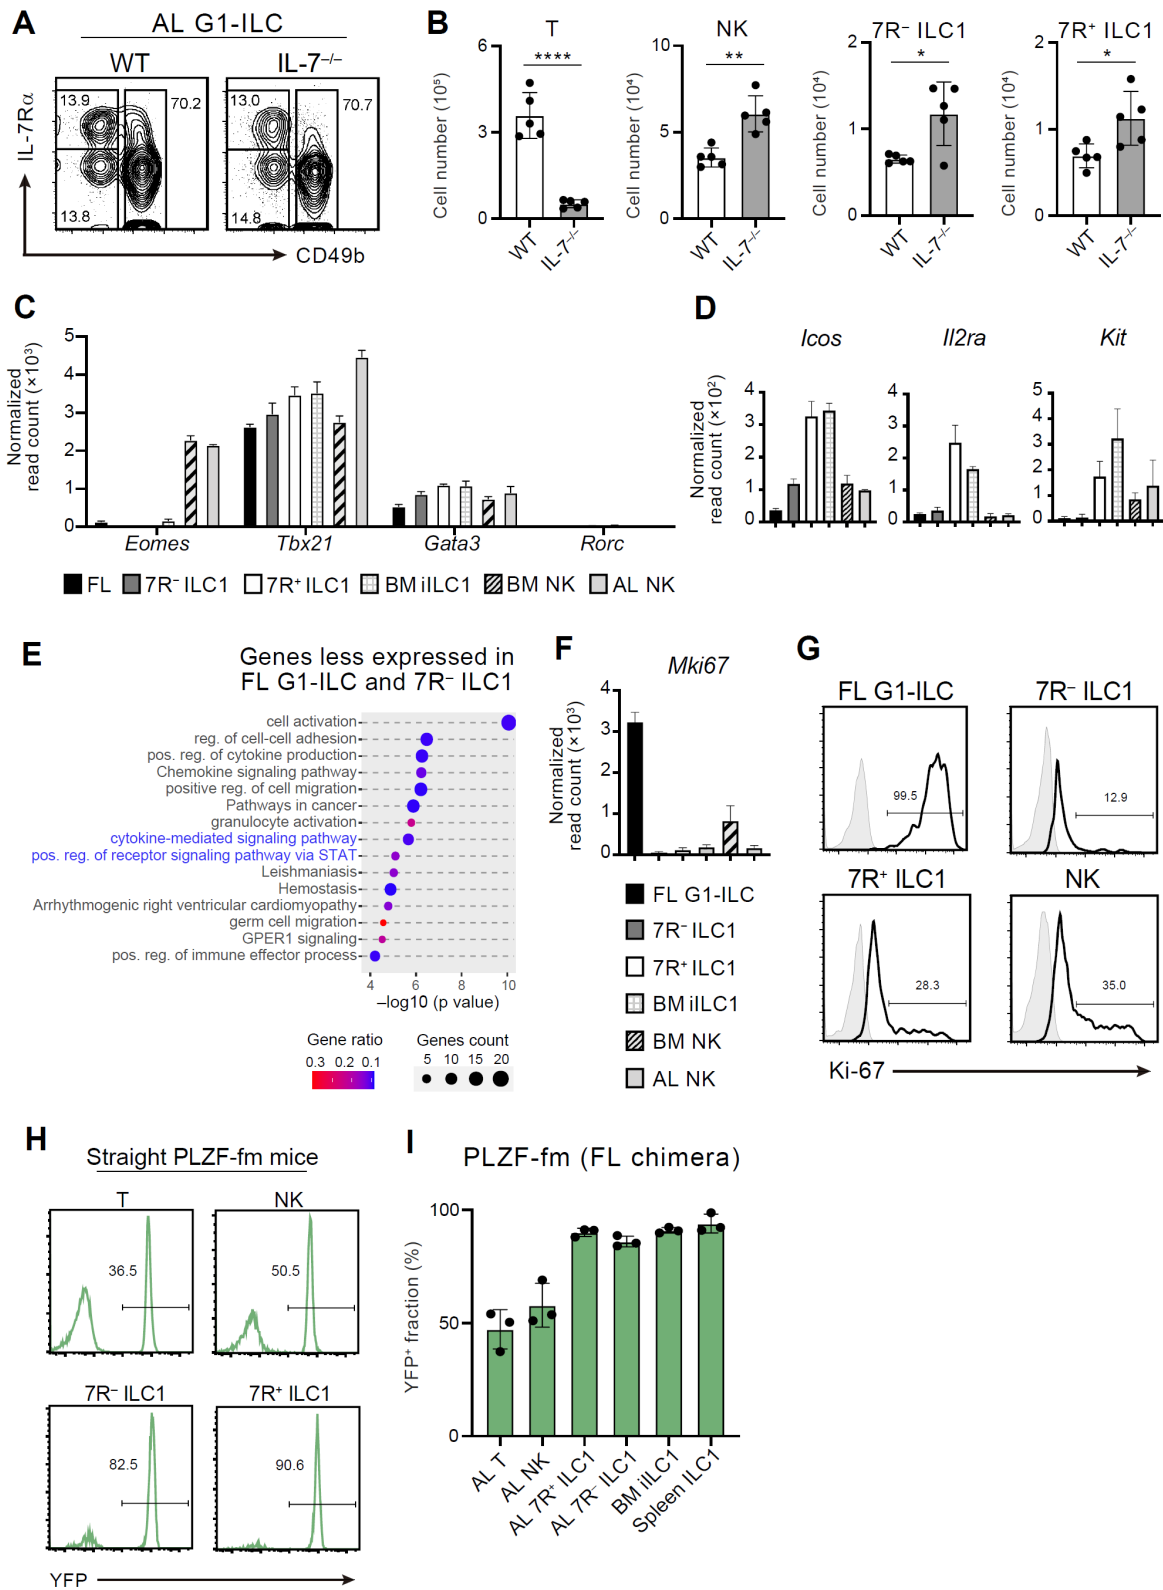

935 **Figure 1–figure supplement 1. Characterization of fetal and adult G1-ILC identities.**

936 (A and B) Flow cytometry (FCM) analysis of AL lymphocytes in control or  $IL-7^{-/-}$  mice.

937 Representative FCM profiles of G1-ILCs (A) and the cell number of each cell population (B)  
938 are shown ( $n = 5$ ).  
939 (C) Normalized read counts of *Eomes*, *Tbx21*, *Gata3*, and *Rorc* expressed on each G1-ILC  
940 population in FL, AL, and BM obtained from RNA-seq.  
941 (D) Normalized read counts of *Icos*, *Il2ra*, and *Kit* expressed on each G1-ILC population.  
942 (E) Dot plots showing the significantly enriched pathways on DEGs less expressed in FL G1-  
943 ILCs and  $7R^-$  ILC1s but not in  $7R^+$  ILC1s and BM iILC1s compared to AL NK cells,  
944 analyzed by Metascape. Gene ratio indicates the ratio of the gene number corresponding to  
945 the DEGs in the pathway (gene count) to the total gene number in the pathway. Pathways  
946 related to cytokine responses were highlighted (blue).  
947 (F) Normalized read counts of *Mki67* expressed on each G1-ILC population obtained from  
948 RNA-seq.  
949 (G) Expression of Ki-67 protein on FL G1-ILCs as well as NK cells,  $7R^-$  ILC1s, and  $7R^+$   
950 ILC1s in AL.  
951 (H) Representative histograms of YFP expression in AL lymphocyte populations of straight  
952 PLZF-GFP-Cre Rosa26-YFP (PLZF-fm) mice ( $n = 2$ ).  
953 (I) Fate-mapping analysis of adult chimeric mice reconstituted with FL YFP<sup>-</sup> LSK cells from  
954 PLZF-fm mice. The percentages of YFP<sup>+</sup> cells in indicated cell populations are shown ( $n = 3$ ).  
955 Data are from two (AL NK cells), three (AL  $7R^+$  ILC1s, BM iILC1s, and BM NK cells), and  
956 four (FL G1-ILCs and AL  $7R^-$  ILC1s) biological replicates (C–F). Data represent one (H and  
957 I) or two (A and G) independent experiments or pooled from multiple independent  
958 experiments (B). Data are presented as mean  $\pm$  SD. \* $p < 0.05$ , \*\* $p < 0.01$ , \*\*\*\* $p < 0.0001$ .  
959

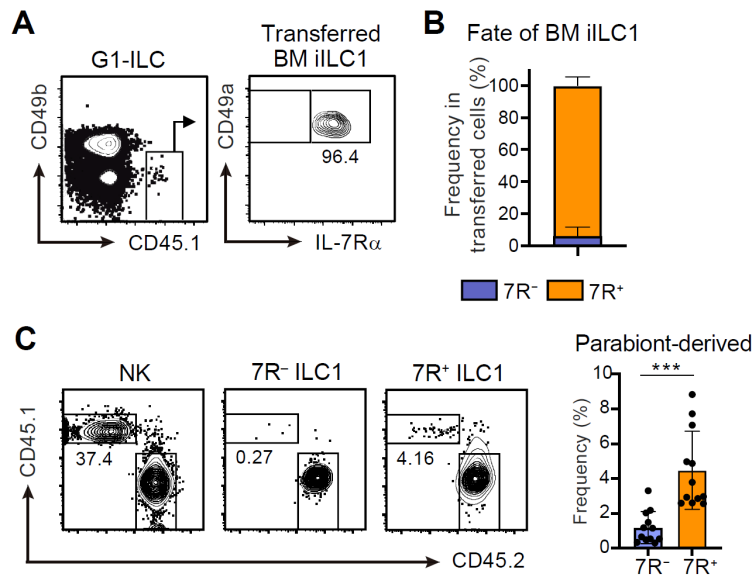

960 **Figure 2–figure supplement 1. BM iILC1s have ability to give rise to AL 7R $^{+}$  ILC1s *in***  
961 ***vivo*.**

962 (A and B) FCM analysis of transferred BM iILC1s (CD45.1) detected in the host liver  
963 (CD45.2) at 4 weeks post-transfer. Representative FCM profiles (A) and the percentages of  
964 transferred cell fate (B) are shown ( $n = 6$ ).

965 (C) FCM analysis of AL G1-ILCs in CD45.2 WT mice conjoined with CD45.1 WT mice in  
966 parabiosis experiments. Representative FCM profiles and the percentages of parabiont-  
967 derived cells in AL 7R $^{-}$  and 7R $^{+}$  ILC1s are shown ( $n = 12$ ).

968 Data represent at least two independent experiments (A and C), or are pooled from multiple  
969 independent experiments (B and C). Data are presented as mean  $\pm$  SD. \*\*\* $p < 0.001$ .

970

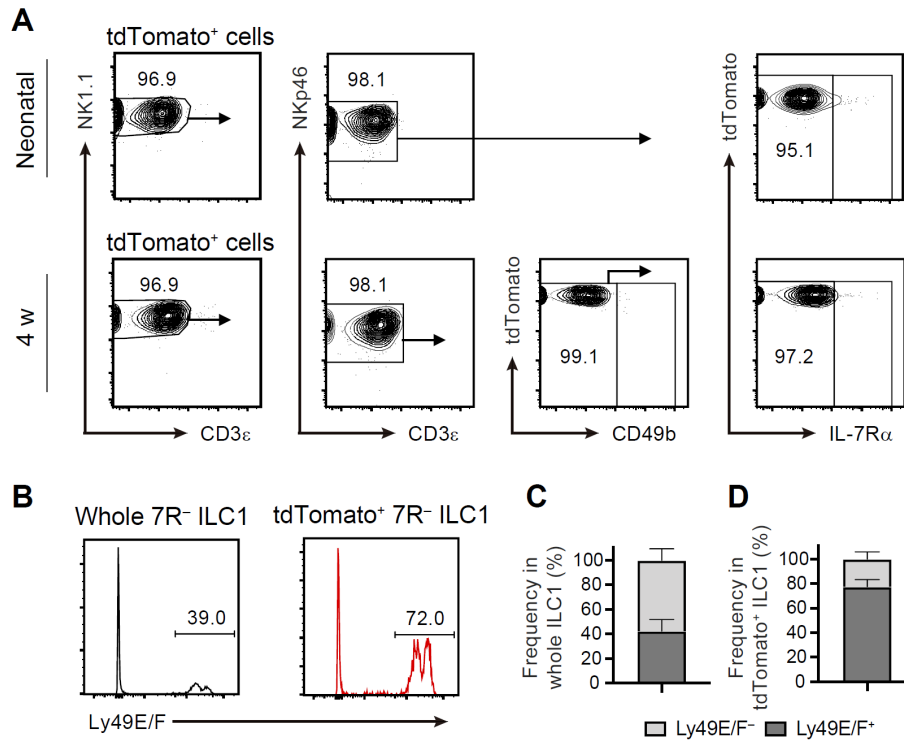

971 **Figure 3–figure supplement 1. FL G1-ILCs contribute to AL 7R<sup>-</sup> ILC1 pool.**

972 (A) FCM analysis of tdTomato<sup>+</sup> cells in AL of NKp46-CreERT2 Rosa26-tdTomato mice  
973 treated with tamoxifen at E17.5. Representative FCM plots in neonates ( $n = 10$ ) and  
974 4 weeks old mice ( $n = 5$ ) are shown.

975 (B–D) FCM analysis of Ly-49E/F expression on 7R<sup>-</sup> ILC1s. Representative histograms (D)  
976 and the percentages of Ly-49E/F<sup>+</sup> and Ly-49E/F<sup>-</sup> fraction in whole 7R<sup>-</sup> ILC1s (C) or in  
977 tdTomato<sup>+</sup> 7R<sup>-</sup> ILC1s (D) are shown ( $n = 5$ ).

978 Data represent at least two independent experiments (A and B) or are pooled from multiple  
979 independent experiments (C and D). Data are presented as mean  $\pm$  SD.

980

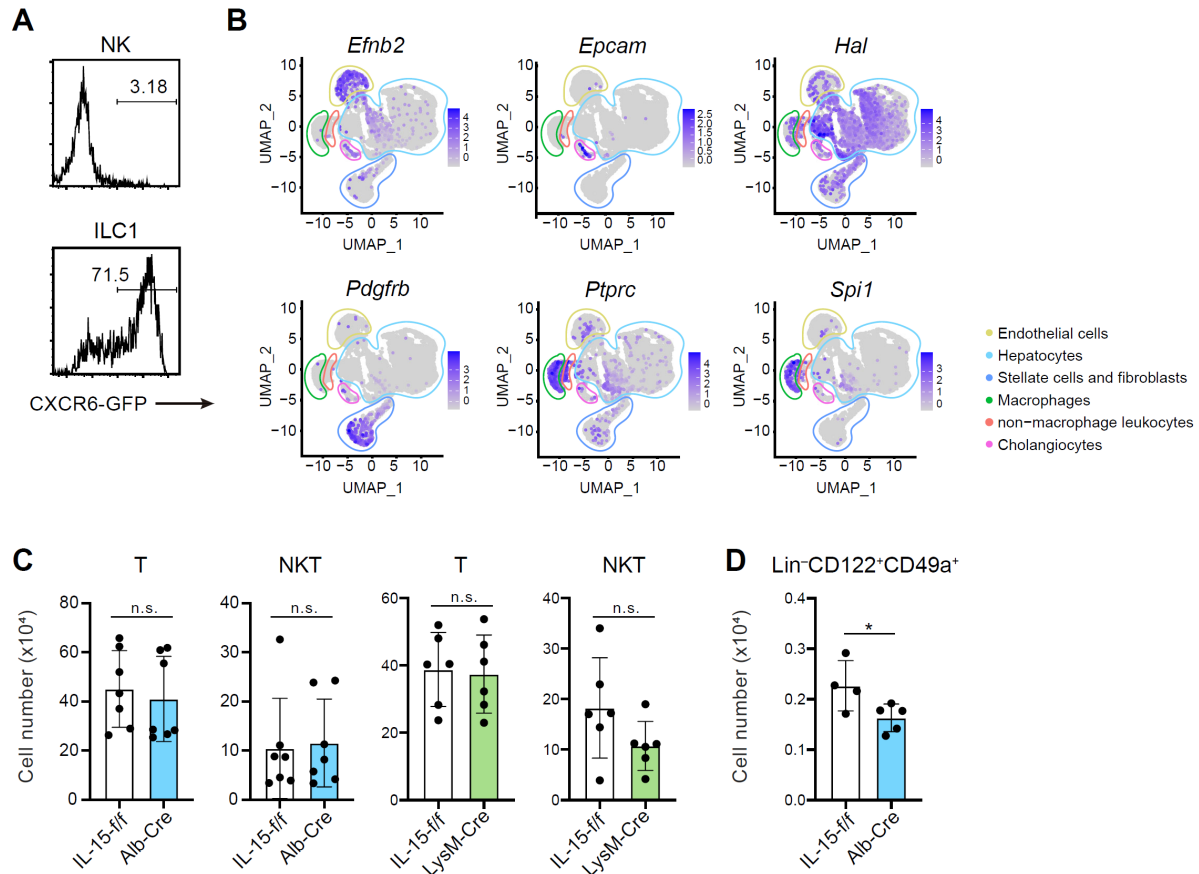

981 **Figure 5–figure supplement 1. Liver IL-15-producing cells supports lymphoid cells in a**  
 982 **subset-dependent manner.**

983 (A) Expression of GFP on AL NK cells and ILC1s in CXCR6<sup>GFP/+</sup> mice.

984 (B) UMAP visualization of snRNA-seq analysis of mouse whole liver cells (Liver Cell Atlas;  
 985 [www.livercellatlas.org](http://www.livercellatlas.org)). Cell identity of each cluster was defined based on the expression of  
 986 *Efnb2*, *Epcam*, *Hal*, *Pdgfrb*, *Ptprc*, and *Spi1*.

987 (C) The cell number of AL T cells and CD3<sup>+</sup>NK1.1<sup>+</sup> (NKT) cells in control, IL-15<sup>Alb-Cre</sup> mice,  
 988 or IL-15<sup>LysM-Cre</sup> mice ( $n = 6-7$ ).

989 (D) The cell number of Lin<sup>-</sup>CD122<sup>+</sup>CD49a<sup>+</sup> cells in control or IL-15<sup>Alb-Cre</sup> mice ( $n = 4-5$ ).

990 Data represent two independent experiments (A) or are pooled from multiple independent  
 991 experiments (C and D) and presented as mean  $\pm$  SD. \* $p < 0.05$ .

992

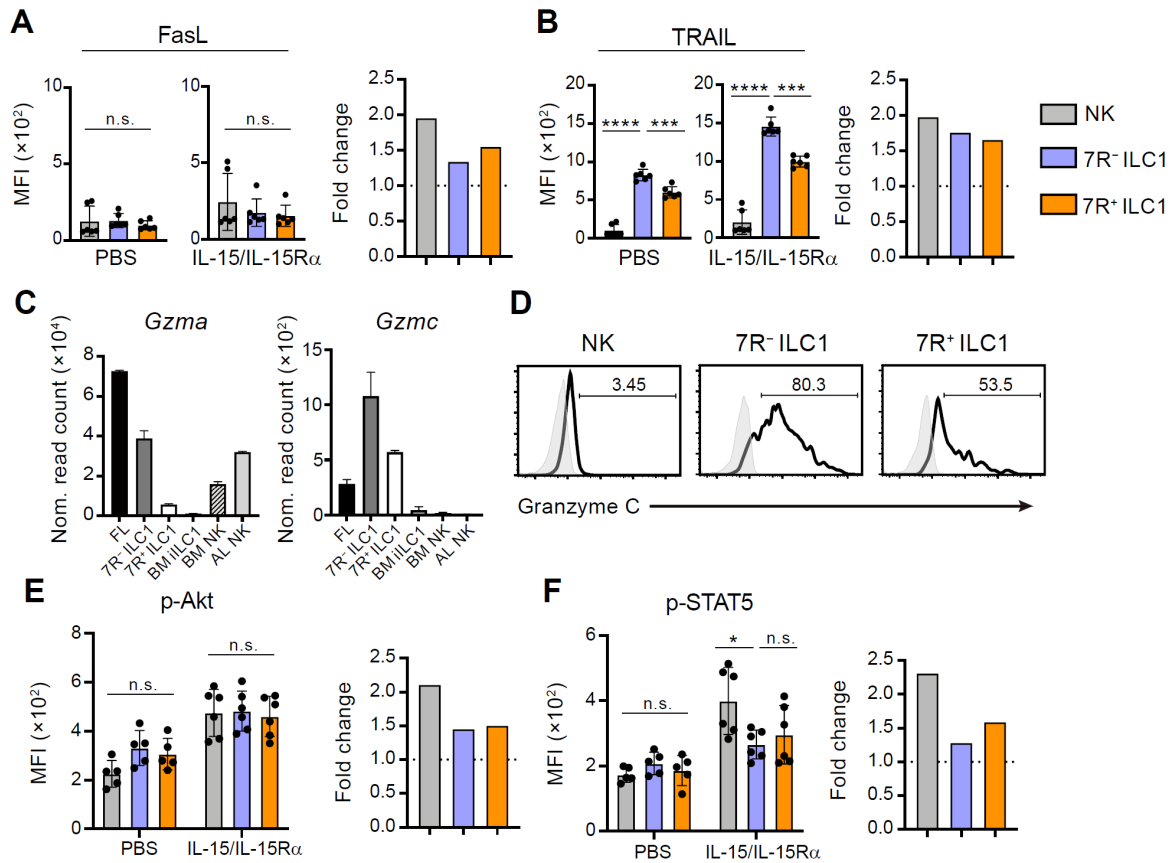

993 **Figure 6-figure supplement 1. Differential effector molecule expression and cytokine**  
 994 **responsiveness among heterogeneous G1-ILC subsets.**

995 (A and B) Expression of FasL (A) and TRAIL (B) on each AL G1-ILC population in control  
 996 or IL-15/IL-15R $\alpha$ -treated mice ( $n = 6$ ). MFI (left) and its fold change after the IL-15/IL-  
 997 15R $\alpha$  treatments (right) are shown.

998 (C) Normalized read counts of *Gzma* and *Gzmc* expressed on each G1-ILC population  
 999 obtained from RNA-seq.

1000 (D) Expression of granzyme C protein on NK cells, 7R $^-$  ILC1s, and 7R $^+$  ILC1s in AL.

1001 (E and F) Phosphorylation levels of Akt (E) and STAT5 (F) on each AL G1-ILC population in  
 1002 control or IL-15/IL-15R $\alpha$ -treated mice ( $n = 5-6$ ). MFI (left) and its fold change after the IL-  
 1003 15/IL-15R $\alpha$  treatments (right) are shown.

1004 Data are from two (AL NK cells), three (AL 7R $^+$  ILC1s, BM iILC1s, and BM NK cells), and  
 1005 four (FL G1-ILCs and AL 7R $^-$  ILC1s) biological replicates (C). Data represent two  
 1006 independent experiments (D) or are pooled from multiple independent experiments (A, B, E,  
 1007 and F) and presented as mean  $\pm$  SD. \* $p < 0.05$ , \*\*\* $p < 0.001$ , \*\*\*\* $p < 0.0001$ .

1008
